# Supplementary material for: Chemical modification of dimethylpolysiloxane for enhancement of CO2 binding enthalpy
Source: Royal Society of Chemistry journal article supplement (doi:10.1039/d2cp02790a), 2023-01-01
Supplement: d2cp02790a1.pdf [file d2cp02790a1.pdf]

# Supporting Information

## Chemical Modification of Dimethylpolysiloxane for Enhancement of CO<sub>2</sub> Binding Enthalpy

Miho Isegawa

International Institute for Carbon-Neutral Energy Research (WPI-I<sup>2</sup>CNER), Kyushu University 744  
Moto-oka, Nishi-ku, Fukuoka 819-0395, Japan

\*E-mail: [isegawa.miho.169@m.kyushu-u.ac.jp](mailto:isegawa.miho.169@m.kyushu-u.ac.jp)

### Contents

|                                                                                                          |            |
|----------------------------------------------------------------------------------------------------------|------------|
| 1. Additional computational details                                                                      | Page S2    |
| 2. Distribution of dihedral angles of PDMS trimer                                                        | Page S2    |
| 3. Structures optimized by M06-2X and PM6                                                                | Page S3    |
| 4. CO <sub>2</sub> binding enthalpies to PDMS trimers calculated at three theoretical levels             | Page S4    |
| 5. Mulliken and NBO charges of CO <sub>2</sub> bound to PDMS and chemically modified PDMS models         | Page S5-S6 |
| 6. Imaginary frequencies (cm <sup>-1</sup> ) of optimized transition states                              | Page S6    |
| 7. Total electronic energy ( $E_{\text{SCF}}$ ) and thermal correction to enthalpy ( $H_{\text{corr}}$ ) | Page S7    |
| 8. XYZ coordinates                                                                                       | Page S8-   |

### Additional computational details

The DLPNO-CCSD(T) calculations were performed using ORCA 5.0.1. To speed up the two-electron integral calculations, the Coulomb integral and exact exchange term were obtained by applying the resolution of identity approximation and chain of spheres algorithm, respectively. The reference Gibbs free energy was estimated from the electron energy at the DLPNO-CCSD(T)/def2-TZVP level and the thermal correction at the M06-2X-D3/6-31G(d) level.

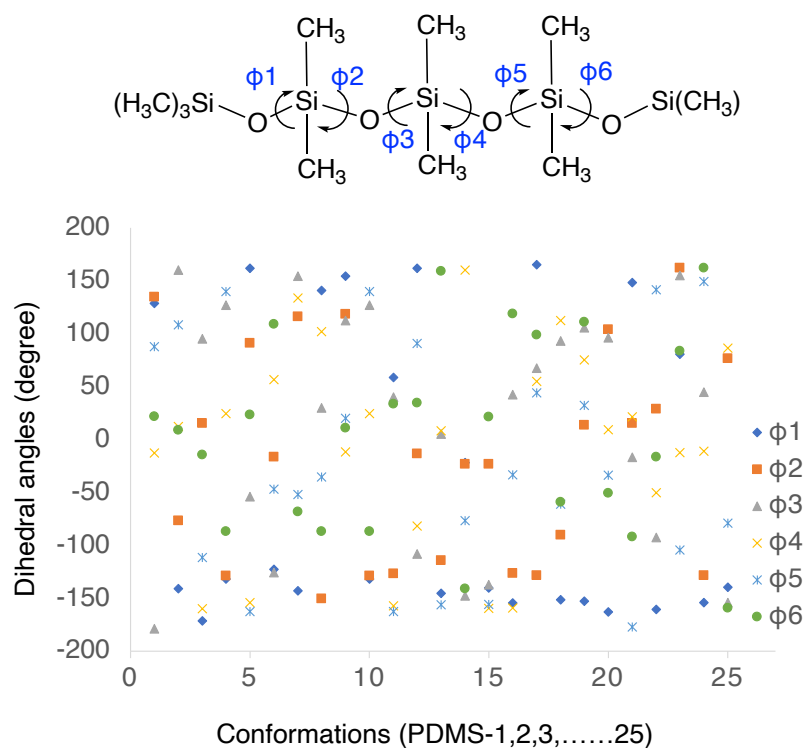

**Figure S1.** Distribution of dihedral angles of PDMS trimer.

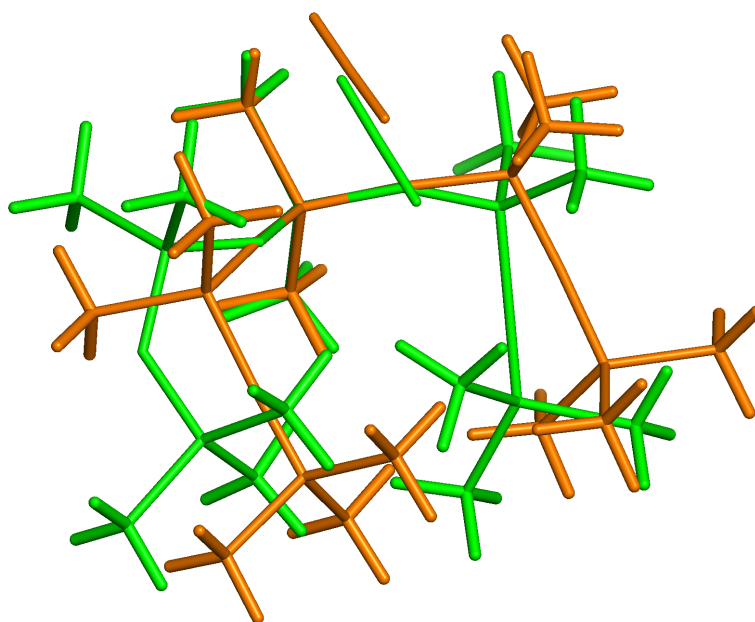

**Figure S2.** Structures optimized by M06-2X (green: PDMS-1 in Fig. 3) vs. structure optimized by PM6 (orange).

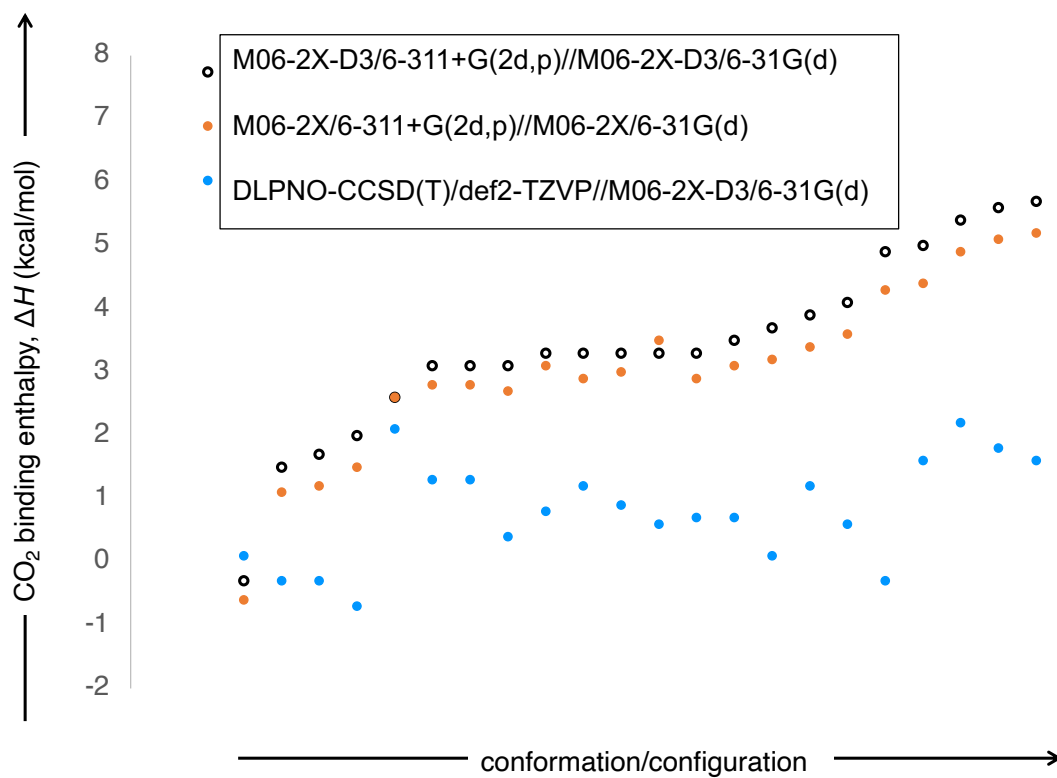

**Figure S3.** Plots of CO<sub>2</sub> binding enthalpies to PDMS trimers calculated at three theoretical levels.

**Table S1.** Mulliken and NBO charges of CO<sub>2</sub> bound to PDMS and chemically modified PDMS models<sup>a</sup>

|     | Mulliken charge |        |        |                        |         |         |         |
|-----|-----------------|--------|--------|------------------------|---------|---------|---------|
|     | PDMS            | PDMS-C | PDMS-S | PDMS-CH <sub>2</sub> F | PDMS-CN | PDMS-OH | PDMS-Ph |
| C   | 0.74            | 0.75   | 0.74   | 0.73                   | 0.75    | 0.76    | 0.74    |
| O   | -0.36           | -0.36  | -0.35  | -0.35                  | -0.36   | -0.33   | -0.36   |
| O   | -0.36           | -0.36  | -0.36  | -0.36                  | -0.35   | -0.39   | -0.35   |
| SUM | 0.02            | 0.03   | 0.03   | 0.02                   | 0.04    | 0.04    | 0.02    |

  

|     | NBO charge |        |        |                        |         |         |         |
|-----|------------|--------|--------|------------------------|---------|---------|---------|
|     | PDMS       | PDMS-C | PDMS-S | PDMS-CH <sub>2</sub> F | PDMS-CN | PDMS-OH | PDMS-Ph |
| C   | 0.55       | 0.55   | 0.55   | 0.55                   | 0.55    | 0.56    | 0.55    |
| O   | -0.28      | -0.28  | -0.27  | -0.27                  | -0.28   | -0.27   | -0.28   |
| O   | -0.27      | -0.27  | -0.28  | -0.28                  | -0.27   | -0.29   | -0.27   |
| SUM | 0.00       | 0.00   | 0.00   | 0.00                   | 0.00    | 0.01    | 0.00    |

  

|     | Mulliken charge |            |            |            |            |       | PDMS-Mg(OH) <sub>2</sub> -M1 | PDMS-Mg(OH) <sub>2</sub> -M6 |
|-----|-----------------|------------|------------|------------|------------|-------|------------------------------|------------------------------|
|     | PDMS-Mg-M1      | PDMS-Mg-M2 | PDMS-Mg-M3 | PDMS-Mg-M4 | PDMS-Mg-M5 |       |                              |                              |
| C   | 0.78            | 0.78       | 0.80       | 0.85       | 0.78       | 0.74  | 0.78                         |                              |
| O   | -0.35           | -0.51      | -0.33      | -0.51      | -0.60      | -0.34 | -0.51                        |                              |
| O   | -0.41           | -0.63      | -0.38      | -0.62      | -0.58      | -0.36 | -0.61                        |                              |
| SUM | 0.03            | -0.36      | 0.09       | -0.27      | -0.40      | 0.04  | -0.34                        |                              |

  

|     | NBO charge |            |            |            |            |       | PDMS-Mg(OH) <sub>2</sub> -M1 | PDMS-Mg(OH) <sub>2</sub> -M6 |
|-----|------------|------------|------------|------------|------------|-------|------------------------------|------------------------------|
|     | PDMS-Mg-M1 | PDMS-Mg-M2 | PDMS-Mg-M3 | PDMS-Mg-M4 | PDMS-Mg-M5 |       |                              |                              |
| C   | 0.57       | 0.55       | 0.57       | 0.54       | 0.55       | 0.56  | 0.54                         |                              |
| O   | -0.27      | -0.36      | -0.26      | -0.35      | -0.39      | -0.27 | -0.36                        |                              |
| O   | -0.30      | -0.41      | -0.31      | -0.46      | -0.45      | -0.28 | -0.48                        |                              |
| SUM | 0.00       | -0.22      | 0.00       | -0.26      | -0.29      | 0.01  | -0.29                        |                              |

<sup>a</sup> See Fig. 4, 5, and 7 in the text for the optimized structures.

**Table 1. (Continue)**

|     | Mulliken charge |                 |
|-----|-----------------|-----------------|
|     | PDMS-Mg-PDMS-M1 | PDMS-Mg-PDMS-M6 |
| C   | 0.75            | 0.77            |
| O   | -0.38           | -0.25           |
| O   | -0.31           | -0.38           |
| SUM | 0.07            | 0.15            |

  

|     | NBO charge      |                 |
|-----|-----------------|-----------------|
|     | PDMS-Mg-PDMS-M1 | PDMS-Mg-PDMS-M6 |
| C   | 0.56            | 0.54            |
| O   | -0.28           | -0.26           |
| O   | -0.27           | -0.34           |
| SUM | 0.01            | -0.06           |

  

|     | Mulliken charge              |                              |                              |
|-----|------------------------------|------------------------------|------------------------------|
|     | PDMS-Ti(OH) <sub>2</sub> -M1 | PDMS-Ti(OH) <sub>2</sub> -M4 | PDMS-Ti(OH) <sub>2</sub> -M6 |
| C   | 0.77                         | 0.86                         | 0.82                         |
| O   | -0.34                        | -0.59                        | -0.65                        |
| O   | -0.38                        | -0.47                        | -0.45                        |
| SUM | 0.05                         | -0.20                        | -0.29                        |

  

|     | NBO charge                   |                              |                              |
|-----|------------------------------|------------------------------|------------------------------|
|     | PDMS-Ti(OH) <sub>2</sub> -M1 | PDMS-Ti(OH) <sub>2</sub> -M4 | PDMS-Ti(OH) <sub>2</sub> -M6 |
| C   | 0.56                         | 0.55                         | 0.54                         |
| O   | -0.27                        | -0.18                        | -0.18                        |
| O   | -0.29                        | -0.32                        | -0.29                        |
| SUM | 0.00                         | 0.05                         | 0.07                         |

**Table S2.** Imaginary frequencies (cm<sup>-1</sup>) of optimized transition states

| label              | frequency |
|--------------------|-----------|
| (H-profile)TS-M3M4 | -249.8    |
| (H-profile)TS-M4M5 | -106.7    |

**Table S3.** Total electronic energy ( $E_{\text{SCF}}$ ), thermal correction to enthalpy ( $H_{\text{corr}}$ ). All are given in a.u.

| label                         | $E_{\text{SCF}}$ | $H_{\text{corr}}$ |
|-------------------------------|------------------|-------------------|
| <b>PDMS</b>                   | -2416.342136     | 0.528609          |
| <b>PDMS-C</b>                 | -2164.819085     | 0.535628          |
| <b>PDMS-S</b>                 | -2739.261171     | 0.527134          |
| <b>PDMS-CH<sub>2</sub>F</b>   | -2614.796321     | 0.516685          |
| <b>PDMS-CN</b>                | -2522.210210     | 0.472200          |
| <b>PDMS-OH</b>                | -2488.281210     | 0.482107          |
| <b>PDMS-Ph</b>                | -2799.772832     | 0.643416          |
| <b>PDMS-Mg-M1</b>             | -2552.914991     | 0.560957          |
| <b>PDMS-Mg-M2</b>             | -2552.915424     | 0.562036          |
| <b>PDMS-Mg-M3</b>             | -2552.907484     | 0.561804          |
| <b>PDMS-Mg-M4</b>             | -2552.917037     | 0.562451          |
| <b>PDMS-Mg-M5</b>             | -2552.932390     | 0.562776          |
| <b>PDMS-MgOH2-M1</b>          | -2768.190369     | 0.562415          |
| <b>PDMS-MgOH2-M6</b>          | -2768.208692     | 0.564121          |
| <b>PDMS-Mg-PDMS-M1</b>        | -4843.813554     | 1.045274          |
| <b>PDMS-Mg-PDMS-M3</b>        | -4843.821357     | 1.045577          |
| <b>PDMS-TiOH-M1</b>           | -2257.028878     | 0.478656          |
| <b>PDMS-TiOH-M4</b>           | -2257.022933     | 0.479138          |
| <b>PDMS-TiOH-M6</b>           | -2257.025247     | 0.481234          |
| (H-profile) <b>PDMS-Mg</b>    | -2364.321350     | 0.544065          |
| (H-profile) <b>PDMS-Mg'</b>   | -2364.318958     | 0.544120          |
| (H-profile) <b>PDMS-Mg-M3</b> | -2552.913100     | 0.560807          |
| (H-profile) <b>TS-M3M4</b>    | -2552.907021     | 0.559553          |
| (H-profile) <b>PDMS-Mg-M4</b> | -2552.920793     | 0.561954          |
| (H-profile) <b>TS-M4M5</b>    | -2552.909667     | 0.561201          |
| (H-profile) <b>PDMS-Mg-M5</b> | -2552.919219     | 0.562426          |

## XYZ coordinates

## PDMS

|    |           |           |           |
|----|-----------|-----------|-----------|
| Si | 2.979904  | 1.937667  | -0.018573 |
| O  | 3.424862  | 0.380784  | -0.434705 |
| Si | 2.776667  | -1.099962 | -0.109930 |
| O  | 1.122371  | -0.974681 | -0.196524 |
| Si | -0.173896 | -1.533674 | -1.061295 |
| O  | -1.455050 | -1.420711 | -0.022098 |
| Si | -3.023519 | -0.880644 | -0.027497 |
| O  | -3.079637 | 0.665363  | -0.602279 |
| Si | -2.552935 | 2.150017  | -0.042602 |
| C  | -4.032266 | -1.944839 | -1.178830 |
| H  | -5.081534 | -1.635018 | -1.191849 |
| H  | -3.651328 | -1.865113 | -2.202801 |
| H  | -3.988824 | -2.997336 | -0.881466 |
| C  | -3.601672 | -0.950237 | 1.745445  |
| H  | -2.950623 | -0.343293 | 2.384378  |
| H  | -4.625954 | -0.577951 | 1.847704  |
| H  | -3.574858 | -1.976834 | 2.125798  |
| C  | -0.464192 | -0.457068 | -2.559494 |
| H  | -1.216715 | -0.902086 | -3.220070 |
| H  | -0.829043 | 0.533425  | -2.270687 |
| H  | 0.457534  | -0.326984 | -3.137249 |
| C  | 0.059272  | -3.323669 | -1.532703 |
| H  | 0.338672  | -3.918767 | -0.657693 |
| H  | -0.879474 | -3.727877 | -1.927348 |
| H  | 0.828123  | -3.450127 | -2.301338 |
| C  | 3.415049  | -2.294466 | -1.392934 |
| H  | 3.082293  | -3.317856 | -1.192770 |
| H  | 3.075870  | -2.013048 | -2.395920 |
| H  | 4.509548  | -2.288880 | -1.401698 |
| C  | 3.219995  | -1.624741 | 1.626350  |
| H  | 2.747404  | -0.966832 | 2.364326  |
| H  | 2.894687  | -2.650749 | 1.825384  |
| H  | 4.302551  | -1.573568 | 1.780037  |
| C  | -2.126601 | 3.198924  | -1.535676 |
| H  | -1.276635 | 2.795255  | -2.094857 |
| H  | -2.979817 | 3.263329  | -2.218492 |
| H  | -1.864415 | 4.217192  | -1.226872 |
| C  | -3.948811 | 2.947376  | 0.924147  |
| H  | -4.836208 | 3.083594  | 0.297996  |
| H  | -4.232971 | 2.325560  | 1.780158  |
| H  | -3.652804 | 3.929116  | 1.309493  |
| C  | 1.605795  | 2.484804  | -1.172605 |
| H  | 1.966413  | 2.552132  | -2.204654 |
| H  | 0.790902  | 1.754434  | -1.147965 |
| H  | 1.193854  | 3.460336  | -0.890588 |
| C  | 4.492449  | 3.019435  | -0.238077 |
| H  | 5.304449  | 2.697120  | 0.421176  |
| H  | 4.858048  | 2.972652  | -1.268659 |
| H  | 4.265811  | 4.065966  | -0.007791 |
| C  | -1.060185 | 1.894241  | 1.066378  |
| H  | -0.465526 | 2.811502  | 1.148268  |
| H  | -1.353461 | 1.594223  | 2.078333  |
| H  | -0.405228 | 1.103869  | 0.680386  |
| C  | 2.416445  | 1.947259  | 1.772487  |
| H  | 3.242115  | 1.665884  | 2.435764  |
| H  | 2.068384  | 2.940970  | 2.075939  |

|   |           |           |          |
|---|-----------|-----------|----------|
| H | 1.591727  | 1.244480  | 1.938367 |
| C | 0.009422  | -1.861587 | 2.248826 |
| O | 0.197195  | -2.950585 | 1.882544 |
| O | -0.165772 | -0.790041 | 2.666303 |

## PDMS-C

|    |           |           |           |
|----|-----------|-----------|-----------|
| Si | -3.502962 | -1.387493 | 0.380420  |
| O  | -2.439251 | -0.322408 | -0.336756 |
| Si | -2.054000 | 1.262690  | -0.554035 |
| O  | -0.469430 | 1.336402  | -0.062620 |
| C  | 0.545625  | 2.307411  | -0.223228 |
| O  | 1.519341  | 2.051278  | 0.757602  |
| Si | 1.798080  | 0.544874  | 1.424266  |
| O  | 2.125091  | -0.551665 | 0.221934  |
| Si | 3.497995  | -1.136740 | -0.524344 |
| C  | 3.304719  | 0.830339  | 2.493968  |
| H  | 3.585312  | -0.075589 | 3.040835  |
| H  | 4.167129  | 1.153565  | 1.901235  |
| H  | 3.096853  | 1.616361  | 3.227074  |
| C  | 0.367018  | -0.097016 | 2.431089  |
| H  | -0.441866 | -0.419805 | 1.772120  |
| H  | 0.674854  | -0.949535 | 3.046147  |
| H  | -0.019512 | 0.683354  | 3.095414  |
| C  | 1.174057  | 2.161286  | -1.604299 |
| H  | 2.046209  | 2.816110  | -1.683203 |
| H  | 1.483302  | 1.122763  | -1.741633 |
| H  | 0.457528  | 2.422420  | -2.388619 |
| C  | 0.013271  | 3.711657  | 0.030735  |
| H  | -0.437603 | 3.753366  | 1.025834  |
| H  | 0.836477  | 4.428538  | -0.014293 |
| H  | -0.733447 | 3.989728  | -0.721098 |
| C  | -2.246712 | 1.693855  | -2.360026 |
| H  | -1.984544 | 2.735320  | -2.575132 |
| H  | -1.613098 | 1.043341  | -2.970471 |
| H  | -3.286724 | 1.543127  | -2.669360 |
| C  | -3.140045 | 2.327877  | 0.535655  |
| H  | -3.041807 | 2.025426  | 1.584615  |
| H  | -2.875664 | 3.387456  | 0.467206  |
| H  | -4.192929 | 2.228104  | 0.251238  |
| C  | 4.615786  | -1.950295 | 0.746911  |
| H  | 5.083412  | -1.216877 | 1.411055  |
| H  | 4.052110  | -2.656269 | 1.366027  |
| H  | 5.417750  | -2.507905 | 0.250468  |
| C  | 2.939763  | -2.410001 | -1.780481 |
| H  | 2.333782  | -3.187262 | -1.301627 |
| H  | 2.342689  | -1.951689 | -2.574678 |
| H  | 3.802293  | -2.899187 | -2.245627 |
| C  | -3.580855 | -2.905911 | -0.712741 |
| H  | -3.874828 | -2.640370 | -1.733309 |
| H  | -2.607944 | -3.404602 | -0.756150 |
| H  | -4.310572 | -3.626922 | -0.328846 |
| C  | -5.200039 | -0.586722 | 0.492804  |
| H  | -5.214553 | 0.227575  | 1.224533  |
| H  | -5.515418 | -0.179457 | -0.474283 |
| H  | -5.950382 | -1.322421 | 0.802860  |
| C  | 4.408562  | 0.274137  | -1.365092 |
| H  | 5.391579  | -0.051570 | -1.722532 |
| H  | 3.847884  | 0.656756  | -2.223586 |
| H  | 4.563531  | 1.109487  | -0.672745 |



C -2.899620 -1.830092 2.097144  
H -2.791984 -0.937319 2.722921  
H -3.608265 -2.503640 2.592029  
H -1.926687 -2.328910 2.053832  
C -0.125128 -1.586849 -1.010951  
O -0.251662 -2.291451 -0.093029  
O -0.004197 -0.933178 -1.966566

PDMS-S

Si -3.941678 0.964311 -0.706925  
O -3.146913 -0.145835 0.270676  
Si -2.163054 -1.448141 0.015169  
S -0.188005 -0.615646 -0.270909  
Si 1.209846 -2.001990 0.634403  
O 2.694601 -1.356879 0.327486  
Si 3.481544 -0.547389 -0.895408  
O 2.974323 1.013802 -0.940305  
Si 2.512673 2.278738 0.040997  
C 5.297823 -0.613597 -0.477869  
H 5.889787 -0.050844 -1.206187  
H 5.473077 -0.174958 0.510337  
H 5.667629 -1.643295 -0.456745  
C 3.063873 -1.336705 -2.532626  
H 1.982718 -1.288112 -2.704025  
H 3.555526 -0.812682 -3.358021  
H 3.373161 -2.386696 -2.563300  
C 1.034937 -2.119490 2.489155  
H 1.958113 -2.549798 2.893266  
H 0.894166 -1.132340 2.938105  
H 0.200099 -2.756107 2.792577  
C 1.055926 -3.670256 -0.201501  
H 1.215898 -3.567177 -1.279560  
H 1.806042 -4.364956 0.191957  
H 0.068499 -4.118845 -0.048282  
C -2.301295 -2.560102 1.508358  
H -1.668322 -3.449777 1.434100  
H -2.044282 -2.015969 2.420789  
H -3.341641 -2.894349 1.590693  
C -2.639021 -2.356023 -1.551007  
H -2.550202 -1.702961 -2.425426  
H -1.972007 -3.210266 -1.710244  
H -3.668247 -2.727661 -1.497885  
C 3.951838 3.479366 0.144664  
H 4.830002 3.001474 0.592199  
H 4.236033 3.835509 -0.850631  
H 3.697673 4.352552 0.755250  
C 1.021154 3.081268 -0.748872  
H 1.280904 3.527029 -1.714379  
H 0.252678 2.320933 -0.919193  
H 0.591551 3.861569 -0.111906  
C -4.741088 2.216938 0.429921  
H -5.396482 1.722545 1.154114  
H -3.988669 2.787982 0.980875  
H -5.348794 2.925613 -0.142992  
C -5.267904 0.066371 -1.689261  
H -4.840746 -0.606113 -2.439811  
H -5.910448 -0.526877 -1.030037  
H -5.904851 0.786165 -2.215324  
C 2.112232 1.637322 1.761276

H 1.847528 2.462277 2.432706  
H 1.270659 0.938397 1.726782  
H 2.965285 1.105551 2.197447  
C -2.701978 1.762317 -1.861181  
H -2.151170 1.010898 -2.439290  
H -3.198096 2.432932 -2.571336  
H -1.969962 2.345910 -1.294569  
C -1.410302 1.323915 2.012964  
O -1.472076 2.240207 1.298646  
O -1.342789 0.437134 2.763879

PDMS-CH2F

Si 2.865709 2.238101 -0.066487  
O 3.452605 0.702381 -0.361531  
Si 2.860876 -0.817318 -0.120099  
O 1.190850 -0.669036 -0.044327  
Si -0.093502 -1.439428 -0.710328  
O -1.369643 -1.325027 0.310748  
Si -2.967691 -0.842888 0.276603  
O -3.061159 0.600595 -0.516130  
Si -2.650345 2.177737 -0.138447  
C -3.969950 -2.096644 -0.660691  
H -5.026026 -1.812449 -0.693556  
H -3.602837 -2.166649 -1.688522  
H -3.895873 -3.085626 -0.197335  
C -3.478506 -0.663497 2.061842  
H -2.834888 0.054465 2.581210  
H -4.515066 -0.321471 2.145717  
H -3.397112 -1.621445 2.586457  
C -0.574059 -0.665611 -2.364360  
F -1.578848 -1.497045 -2.883074  
H -0.992298 0.342260 -2.264936  
H 0.246842 -0.629752 -3.091292  
C 0.351184 -3.262200 -0.986656  
F 1.363850 -3.628409 -0.095773  
H -0.508015 -3.919340 -0.813184  
H 0.716601 -3.446410 -2.005101  
C 3.364202 -1.846708 -1.592705  
H 3.156752 -2.907452 -1.433738  
H 2.842816 -1.516515 -2.499006  
H 4.436318 -1.724890 -1.776345  
C 3.445460 -1.487731 1.513408  
H 3.122455 -0.830026 2.328848  
H 3.032698 -2.485280 1.688231  
H 4.537629 -1.546789 1.546168  
C -2.276156 3.055225 -1.751108  
H -1.377922 2.662043 -2.237987  
H -3.112263 2.950998 -2.449860  
H -2.112791 4.124857 -1.577662  
C -4.110078 2.988729 0.713905  
H -4.997317 2.978654 0.073021  
H -4.359432 2.465270 1.643301  
H -3.888693 4.030847 0.968622  
C 1.469067 2.568798 -1.280000  
H 1.848739 2.579774 -2.307586  
H 0.714113 1.779079 -1.204170  
H 0.972116 3.526980 -1.091715  
C 4.275477 3.433036 -0.365571  
H 5.110368 3.230569 0.312495

|   |           |           |           |
|---|-----------|-----------|-----------|
| H | 4.647914  | 3.348905  | -1.391291 |
| H | 3.955380  | 4.468383  | -0.206614 |
| C | -1.154736 | 2.166438  | 0.996931  |
| H | -0.617927 | 3.121107  | 0.952994  |
| H | -1.434089 | 1.989210  | 2.041046  |
| H | -0.446829 | 1.375683  | 0.720627  |
| C | 2.290706  | 2.328350  | 1.716426  |
| H | 3.140927  | 2.185537  | 2.392886  |
| H | 1.837925  | 3.298335  | 1.949485  |
| H | 1.547360  | 1.554574  | 1.938108  |
| C | 0.154292  | -1.358565 | 2.594693  |
| O | 0.397530  | -2.465089 | 2.332742  |
| O | -0.078269 | -0.257440 | 2.893024  |

PDMS-CN

|    |           |           |           |
|----|-----------|-----------|-----------|
| Si | 3.888145  | -1.297318 | -0.455385 |
| O  | 2.652935  | -0.184148 | -0.241016 |
| Si | 2.418015  | 1.065966  | 0.805486  |
| O  | 1.217119  | 2.026422  | 0.131463  |
| Si | -0.382726 | 2.132155  | 0.038108  |
| O  | -1.098895 | 0.807833  | -0.523582 |
| Si | -2.550687 | 0.290109  | -1.214235 |
| O  | -2.717766 | -1.263232 | -0.712289 |
| Si | -3.184413 | -1.954197 | 0.749485  |
| C  | -3.889945 | 1.410299  | -0.553945 |
| H  | -4.877304 | 1.101803  | -0.912702 |
| H  | -3.914845 | 1.414948  | 0.541523  |
| H  | -3.726278 | 2.442026  | -0.887691 |
| C  | -2.379536 | 0.369655  | -3.058453 |
| H  | -1.551464 | -0.260242 | -3.393133 |
| H  | -3.295600 | 0.028753  | -3.550310 |
| H  | -2.183818 | 1.398390  | -3.379516 |
| C  | -1.079758 | 2.513196  | 1.715911  |
| N  | -1.522355 | 2.720634  | 2.765255  |
| C  | -0.833658 | 3.565485  | -1.043563 |
| N  | -1.181370 | 4.419157  | -1.743333 |
| C  | 1.795397  | 0.444104  | 2.446024  |
| H  | 1.458079  | 1.265072  | 3.087186  |
| H  | 0.955151  | -0.242704 | 2.296622  |
| H  | 2.577553  | -0.104538 | 2.981299  |
| C  | 3.935563  | 2.136572  | 0.921393  |
| H  | 4.210822  | 2.515236  | -0.067918 |
| H  | 3.758230  | 2.995537  | 1.575761  |
| H  | 4.789317  | 1.579766  | 1.322887  |
| C  | -5.057274 | -1.909189 | 0.842390  |
| H  | -5.431421 | -0.879965 | 0.859293  |
| H  | -5.506245 | -2.417543 | -0.016885 |
| H  | -5.414657 | -2.405385 | 1.751196  |
| C  | -2.566319 | -3.718879 | 0.738840  |
| H  | -2.929232 | -4.252365 | -0.145323 |
| H  | -1.473072 | -3.750430 | 0.733798  |
| H  | -2.915945 | -4.258855 | 1.625193  |
| C  | 3.182701  | -2.772719 | -1.364107 |
| H  | 2.433221  | -3.291856 | -0.756822 |
| H  | 2.716666  | -2.477243 | -2.308693 |
| H  | 3.977038  | -3.492383 | -1.589895 |
| C  | 4.515143  | -1.818792 | 1.236356  |
| H  | 4.927151  | -0.974047 | 1.800741  |
| H  | 3.705513  | -2.257706 | 1.829717  |

|   |           |           |           |
|---|-----------|-----------|-----------|
| H | 5.308089  | -2.569015 | 1.146565  |
| C | -2.440744 | -0.971100 | 2.162723  |
| H | -2.653653 | -1.452154 | 3.123699  |
| H | -1.353828 | -0.903466 | 2.054497  |
| H | -2.836782 | 0.048913  | 2.215017  |
| C | 5.254413  | -0.492105 | -1.452692 |
| H | 5.692867  | 0.358131  | -0.919693 |
| H | 6.059539  | -1.204048 | -1.663647 |
| H | 4.869636  | -0.125446 | -2.409646 |
| C | 0.266545  | -1.565628 | -0.808042 |
| O | 0.250791  | -1.820266 | 0.329535  |
| O | 0.283255  | -1.350001 | -1.949365 |

PDMS-OH

|    |           |           |           |
|----|-----------|-----------|-----------|
| Si | 3.224277  | 1.613918  | 0.335284  |
| O  | 2.943626  | -0.038894 | 0.415836  |
| Si | 2.510847  | -1.167676 | -0.713259 |
| O  | 0.866028  | -1.073681 | -0.897443 |
| Si | -0.544867 | -1.834579 | -0.609418 |
| O  | -1.363747 | -0.867979 | 0.422964  |
| Si | -2.981342 | -0.639907 | 0.779781  |
| O  | -3.534716 | 0.616005  | -0.126377 |
| Si | -2.776770 | 1.954296  | -0.789303 |
| C  | -3.944227 | -2.174974 | 0.350373  |
| H  | -4.996648 | -2.076478 | 0.632928  |
| H  | -3.895202 | -2.348177 | -0.728784 |
| H  | -3.532862 | -3.054707 | 0.856427  |
| C  | -3.031959 | -0.216035 | 2.595687  |
| H  | -2.395113 | 0.650524  | 2.803304  |
| H  | -4.048083 | 0.027145  | 2.920409  |
| H  | -2.673568 | -1.054084 | 3.203277  |
| O  | -1.420954 | -2.054103 | -1.979907 |
| H  | -1.469813 | -2.973572 | -2.273142 |
| O  | -0.302006 | -3.341078 | 0.011261  |
| H  | 0.158424  | -3.350587 | 0.862400  |
| C  | 3.266990  | -0.782273 | -2.375095 |
| H  | 2.983818  | -1.547229 | -3.105412 |
| H  | 2.912551  | 0.181286  | -2.756421 |
| H  | 4.359920  | -0.750138 | -2.323166 |
| C  | 3.008616  | -2.849074 | -0.079339 |
| H  | 2.731092  | -2.964440 | 0.972488  |
| H  | 2.531331  | -3.649119 | -0.653692 |
| H  | 4.093565  | -2.975962 | -0.151250 |
| C  | -4.122001 | 2.985540  | -1.585077 |
| H  | -4.622927 | 2.424535  | -2.380166 |
| H  | -4.879215 | 3.273805  | -0.849283 |
| H  | -3.711114 | 3.900595  | -2.024655 |
| C  | -1.939233 | 2.898489  | 0.600761  |
| H  | -2.671293 | 3.261802  | 1.330013  |
| H  | -1.230672 | 2.249935  | 1.129353  |
| H  | -1.379561 | 3.761086  | 0.222484  |
| C  | 1.757104  | 2.427188  | -0.501167 |
| H  | 1.646168  | 2.078709  | -1.534462 |
| H  | 0.830673  | 2.184321  | 0.029056  |
| H  | 1.861638  | 3.517500  | -0.524385 |
| C  | 4.792906  | 1.930855  | -0.649136 |
| H  | 5.626294  | 1.335476  | -0.261389 |
| H  | 4.671054  | 1.691484  | -1.710000 |
| H  | 5.077508  | 2.986674  | -0.578899 |

|   |           |           |           |
|---|-----------|-----------|-----------|
| C | -1.515114 | 1.400335  | -2.059031 |
| H | -1.142375 | 2.252758  | -2.638708 |
| H | -0.654104 | 0.923544  | -1.578928 |
| H | -1.950400 | 0.675067  | -2.754319 |
| C | 3.464785  | 2.227045  | 2.087089  |
| H | 4.264447  | 1.668437  | 2.584323  |
| H | 3.747439  | 3.285345  | 2.086327  |
| H | 2.553075  | 2.122378  | 2.680827  |
| C | 0.690719  | -0.437022 | 2.135998  |
| O | 0.499739  | 0.705436  | 2.204380  |
| O | 0.884831  | -1.587340 | 2.117270  |

PDMS-Ph

|    |           |           |           |
|----|-----------|-----------|-----------|
| Si | -4.135558 | -0.201803 | -0.004926 |
| O  | -3.110802 | -1.476520 | 0.339427  |
| Si | -1.808076 | -2.229199 | -0.337116 |
| O  | -0.585390 | -1.114887 | -0.486062 |
| Si | 0.876791  | -0.680445 | 0.136173  |
| O  | 1.557443  | 0.283280  | -1.009069 |
| Si | 2.432389  | 1.682984  | -1.190511 |
| O  | 1.815628  | 2.840361  | -0.195511 |
| Si | 0.330124  | 3.605767  | -0.091203 |
| C  | 4.204534  | 1.360821  | -0.711759 |
| H  | 4.815203  | 2.261736  | -0.825254 |
| H  | 4.284366  | 1.031616  | 0.329115  |
| H  | 4.633834  | 0.573793  | -1.340216 |
| C  | 2.266350  | 2.178231  | -2.983178 |
| H  | 1.217834  | 2.347825  | -3.249978 |
| H  | 2.823077  | 3.098186  | -3.188914 |
| H  | 2.655381  | 1.394958  | -3.643062 |
| C  | -1.285059 | -3.597640 | 0.812502  |
| H  | -0.393585 | -4.112881 | 0.440574  |
| H  | -1.047874 | -3.192512 | 1.802897  |
| H  | -2.087028 | -4.332097 | 0.935798  |
| C  | -2.212246 | -2.817183 | -2.061975 |
| H  | -2.420466 | -1.965356 | -2.719290 |
| H  | -1.373585 | -3.377420 | -2.487661 |
| H  | -3.093985 | -3.465820 | -2.064599 |
| C  | -0.030281 | 3.960532  | 1.707743  |
| H  | -0.294243 | 3.039554  | 2.237563  |
| H  | 0.838105  | 4.400316  | 2.208355  |
| H  | -0.868652 | 4.659700  | 1.802780  |
| C  | 0.443971  | 5.196916  | -1.080813 |
| H  | 1.234043  | 5.846324  | -0.690434 |
| H  | 0.671410  | 4.987724  | -2.131866 |
| H  | -0.498566 | 5.753918  | -1.047321 |
| C  | -3.893569 | 1.131863  | 1.292955  |
| H  | -4.038944 | 0.719130  | 2.297740  |
| H  | -2.895002 | 1.578458  | 1.255016  |
| H  | -4.626491 | 1.934869  | 1.154377  |
| C  | -5.889044 | -0.856406 | 0.097089  |
| H  | -6.047812 | -1.660487 | -0.628920 |
| H  | -6.099531 | -1.258379 | 1.093245  |
| H  | -6.619785 | -0.067244 | -0.110208 |
| C  | -1.006026 | 2.503748  | -0.815375 |
| H  | -1.988225 | 2.983150  | -0.720475 |
| H  | -0.841060 | 2.290258  | -1.876817 |
| H  | -1.056307 | 1.539026  | -0.295834 |
| C  | -3.775863 | 0.447818  | -1.728421 |

|   |           |           |           |
|---|-----------|-----------|-----------|
| H | -4.174232 | -0.225187 | -2.495657 |
| H | -4.233465 | 1.431925  | -1.879625 |
| H | -2.698145 | 0.554757  | -1.895665 |
| C | 0.586380  | 0.181655  | 1.766516  |
| C | 1.642524  | 0.794559  | 2.457855  |
| C | -0.670699 | 0.138203  | 2.385059  |
| C | 1.452839  | 1.344468  | 3.721753  |
| H | 2.630726  | 0.843080  | 2.004909  |
| C | -0.867543 | 0.688907  | 3.651535  |
| H | -1.511415 | -0.327124 | 1.874065  |
| C | 0.195285  | 1.288833  | 4.321736  |
| H | 2.282033  | 1.818327  | 4.237889  |
| H | -1.850555 | 0.649014  | 4.111485  |
| H | 0.044582  | 1.717374  | 5.307939  |
| C | 2.001792  | -2.144158 | 0.400338  |
| C | 2.089181  | -2.767306 | 1.653384  |
| C | 2.774193  | -2.656750 | -0.652615 |
| C | 2.906933  | -3.877646 | 1.847422  |
| H | 1.514108  | -2.376320 | 2.490588  |
| C | 3.594994  | -3.765204 | -0.462565 |
| H | 2.728130  | -2.183476 | -1.629650 |
| C | 3.659291  | -4.377953 | 0.787271  |
| H | 2.961481  | -4.348635 | 2.824145  |
| H | 4.185853  | -4.150842 | -1.287909 |
| H | 4.299562  | -5.242322 | 0.936191  |
| C | 0.124428  | -0.724880 | -3.157896 |
| O | 0.783141  | -1.683219 | -3.110728 |
| O | -0.544315 | 0.221017  | -3.263123 |

PDMS-Mg-M1

|    |           |           |           |
|----|-----------|-----------|-----------|
| Si | 2.920075  | -2.079914 | -1.062536 |
| O  | 2.252461  | -1.439621 | 0.325913  |
| Si | 2.549375  | -0.187462 | 1.444739  |
| O  | 1.559015  | 1.034633  | 1.131196  |
| Mg | 0.022595  | 1.129700  | -0.040421 |
| O  | -1.491243 | 1.474368  | -1.326219 |
| Si | -2.980819 | 0.868375  | -1.236086 |
| O  | -3.123050 | 0.101999  | 0.268156  |
| Si | -3.746988 | -1.267514 | 0.979462  |
| C  | -4.328056 | 2.168937  | -1.277558 |
| H  | -5.319638 | 1.716119  | -1.168577 |
| H  | -4.196088 | 2.880145  | -0.455105 |
| H  | -4.315067 | 2.733374  | -2.215355 |
| C  | -3.309250 | -0.437568 | -2.550748 |
| H  | -2.548723 | -1.228082 | -2.543998 |
| H  | -4.287356 | -0.915785 | -2.421263 |
| H  | -3.293388 | 0.016057  | -3.547465 |
| C  | 2.200368  | -0.993266 | 3.103603  |
| H  | 2.318721  | -0.278877 | 3.924697  |
| H  | 1.171280  | -1.371091 | 3.132583  |
| H  | 2.867185  | -1.841355 | 3.290713  |
| C  | 4.366595  | 0.272944  | 1.324249  |
| H  | 4.588472  | 0.795516  | 0.388502  |
| H  | 4.638056  | 0.939618  | 2.150554  |
| H  | 5.016658  | -0.607745 | 1.384328  |
| C  | -5.617563 | -1.136119 | 1.009750  |
| H  | -5.936412 | -0.227759 | 1.530914  |
| H  | -6.021213 | -1.094561 | -0.008300 |
| H  | -6.073995 | -1.994732 | 1.513515  |

|   |           |           |           |
|---|-----------|-----------|-----------|
| C | -3.238470 | -2.830894 | 0.070259  |
| H | -3.596086 | -2.851828 | -0.963606 |
| H | -2.150117 | -2.950383 | 0.068181  |
| H | -3.659258 | -3.704168 | 0.581915  |
| C | 1.469656  | -2.501583 | -2.182363 |
| H | 0.750200  | -3.156877 | -1.676445 |
| H | 0.961852  | -1.581733 | -2.492711 |
| H | 1.804131  | -3.021978 | -3.085896 |
| C | 3.867597  | -3.633172 | -0.607716 |
| H | 4.682557  | -3.400628 | 0.086221  |
| H | 3.214169  | -4.364271 | -0.121220 |
| H | 4.306639  | -4.106428 | -1.492659 |
| C | -3.023368 | -1.299921 | 2.709662  |
| H | -3.395826 | -2.151907 | 3.287496  |
| H | -1.932298 | -1.389957 | 2.650666  |
| H | -3.266560 | -0.388557 | 3.266921  |
| C | 4.061749  | -0.858280 | -1.912268 |
| H | 5.021118  | -0.770822 | -1.393340 |
| H | 4.264025  | -1.181858 | -2.939481 |
| H | 3.607936  | 0.136523  | -1.956572 |
| O | 1.030613  | 0.884799  | -1.876579 |
| H | 0.241236  | 1.221017  | -2.347639 |
| H | 1.715027  | 1.576555  | -1.888362 |
| O | -1.191962 | 1.494525  | 1.627168  |
| H | -0.646477 | 1.041161  | 2.291707  |
| H | -1.964217 | 0.923465  | 1.412776  |
| O | 0.095763  | 3.268283  | -0.288787 |
| H | -0.121427 | 3.584213  | 0.603482  |
| H | -0.761165 | 3.125081  | -0.753269 |
| O | -0.375015 | -0.930869 | 0.124766  |
| H | 0.535801  | -1.322547 | 0.135733  |
| H | -0.823168 | -1.256911 | -0.670478 |
| C | 2.756421  | 3.182290  | 0.158656  |
| O | 2.565098  | 3.782219  | 1.131599  |
| O | 3.017721  | 2.660488  | -0.855387 |

PDMS-Mg-M2

|    |           |           |           |
|----|-----------|-----------|-----------|
| Si | 4.199732  | -1.455745 | -0.413330 |
| O  | 3.132505  | -0.322777 | 0.206727  |
| Si | 3.171772  | 1.154503  | 1.077436  |
| O  | 1.676131  | 1.727627  | 1.007018  |
| Mg | 0.161824  | 1.043228  | -0.060928 |
| O  | -1.522240 | 0.430859  | -1.221906 |
| Si | -3.098633 | 1.026061  | -0.856303 |
| O  | -3.478902 | 0.357687  | 0.615847  |
| Si | -4.023053 | -1.125432 | 1.219419  |
| C  | -2.902214 | 2.860419  | -0.610332 |
| H  | -3.883636 | 3.286281  | -0.372815 |
| H  | -2.207042 | 3.123614  | 0.188466  |
| H  | -2.544071 | 3.334421  | -1.529758 |
| C  | -4.330844 | 0.727945  | -2.219114 |
| H  | -4.734081 | -0.284068 | -2.209863 |
| H  | -5.149548 | 1.451382  | -2.143875 |
| H  | -3.839914 | 0.880988  | -3.186704 |
| C  | 3.745183  | 0.726121  | 2.808752  |
| H  | 3.702793  | 1.604910  | 3.460106  |
| H  | 3.096431  | -0.041186 | 3.245411  |
| H  | 4.772303  | 0.346592  | 2.822868  |
| C  | 4.448237  | 2.207488  | 0.189592  |

|   |           |           |           |
|---|-----------|-----------|-----------|
| H | 4.170175  | 2.344898  | -0.862262 |
| H | 4.536507  | 3.199817  | 0.643288  |
| H | 5.441888  | 1.743956  | 0.213289  |
| C | -4.778876 | -0.682083 | 2.879969  |
| H | -4.039285 | -0.224274 | 3.546123  |
| H | -5.602283 | 0.028937  | 2.759259  |
| H | -5.172209 | -1.571217 | 3.384241  |
| C | -5.309417 | -1.879552 | 0.092160  |
| H | -6.102801 | -1.163903 | -0.148183 |
| H | -4.843400 | -2.218140 | -0.836974 |
| H | -5.776181 | -2.742911 | 0.579434  |
| C | 3.155342  | -2.982305 | -0.711677 |
| H | 2.741346  | -3.368189 | 0.226462  |
| H | 2.315571  | -2.760265 | -1.381934 |
| H | 3.737614  | -3.786742 | -1.172602 |
| C | 5.581845  | -1.776037 | 0.810071  |
| H | 6.178515  | -0.872648 | 0.978676  |
| H | 5.186473  | -2.103372 | 1.777158  |
| H | 6.257547  | -2.554895 | 0.440857  |
| C | -2.558536 | -2.265557 | 1.476110  |
| H | -2.815819 | -3.069282 | 2.175033  |
| H | -2.257469 | -2.716079 | 0.526048  |
| H | -1.692368 | -1.732419 | 1.884899  |
| C | 4.880670  | -0.797188 | -2.031864 |
| H | 5.479114  | 0.106554  | -1.876423 |
| H | 5.518741  | -1.540356 | -2.521964 |
| H | 4.072291  | -0.547198 | -2.728556 |
| O | 1.296227  | 0.637724  | -1.776731 |
| H | 2.116376  | 0.284593  | -1.381990 |
| H | 0.759221  | -0.152488 | -2.079700 |
| O | -1.084334 | 1.441474  | 1.534822  |
| H | -0.546162 | 1.226117  | 2.312301  |
| H | -1.940798 | 0.967318  | 1.579351  |
| O | 0.198733  | 3.029003  | -0.781237 |
| H | 0.635240  | 2.873080  | -1.636055 |
| H | 0.933721  | 3.155152  | -0.140669 |
| O | 0.470732  | -0.926748 | 0.600193  |
| H | 1.450466  | -0.948281 | 0.653036  |
| H | 0.236307  | -1.488272 | -0.170858 |
| C | -1.508958 | -0.955863 | -1.643452 |
| O | -2.596405 | -1.511545 | -1.612865 |
| O | -0.363132 | -1.373666 | -1.935167 |

PDMS-Mg-M3

|    |           |           |           |
|----|-----------|-----------|-----------|
| Si | 3.950251  | -1.833794 | -0.666637 |
| O  | 3.776491  | -0.176558 | -0.590541 |
| Si | 3.528499  | 0.849667  | 0.754059  |
| O  | 1.973416  | 0.835245  | 1.151832  |
| Mg | 0.328561  | 0.777237  | 0.138579  |
| O  | -1.197918 | 1.023169  | -1.055079 |
| Si | -2.769750 | 0.765807  | -0.911912 |
| O  | -2.948777 | -0.623948 | 0.089312  |
| Si | -4.163583 | -1.754154 | 0.338594  |
| C  | -3.691357 | 2.130010  | -0.012945 |
| H  | -4.731070 | 1.857288  | 0.198836  |
| H  | -3.202339 | 2.378327  | 0.936507  |
| H  | -3.697670 | 3.045883  | -0.612108 |
| C  | -3.621832 | 0.361473  | -2.533631 |
| H  | -3.157841 | -0.507947 | -3.011463 |

|            |           |           |           |
|------------|-----------|-----------|-----------|
| H          | -4.689150 | 0.148412  | -2.400641 |
| H          | -3.539550 | 1.205463  | -3.226281 |
| C          | 4.614032  | 0.218746  | 2.152165  |
| H          | 4.564275  | 0.910699  | 2.999858  |
| H          | 4.274194  | -0.758131 | 2.514815  |
| H          | 5.664097  | 0.127979  | 1.854605  |
| C          | 4.153460  | 2.514815  | 0.163500  |
| H          | 3.584233  | 2.858003  | -0.706561 |
| H          | 4.046886  | 3.272157  | 0.947060  |
| H          | 5.209607  | 2.465573  | -0.120829 |
| C          | -5.791800 | -0.869587 | 0.620503  |
| H          | -5.724803 | -0.189227 | 1.476370  |
| H          | -6.089105 | -0.281089 | -0.254269 |
| H          | -6.593577 | -1.587100 | 0.825762  |
| C          | -4.273439 | -2.911178 | -1.132341 |
| H          | -4.628085 | -2.394094 | -2.029114 |
| H          | -3.295680 | -3.348027 | -1.361636 |
| H          | -4.965721 | -3.734226 | -0.923818 |
| C          | 2.489251  | -2.627291 | 0.227057  |
| H          | 2.320746  | -2.126912 | 1.188901  |
| H          | 1.603173  | -2.505853 | -0.408380 |
| H          | 2.638586  | -3.695760 | 0.410804  |
| C          | 5.572983  | -2.397468 | 0.086971  |
| H          | 6.405604  | -1.801512 | -0.301082 |
| H          | 5.579434  | -2.313718 | 1.177203  |
| H          | 5.762906  | -3.445387 | -0.171080 |
| C          | -3.648128 | -2.693548 | 1.877548  |
| H          | -4.382937 | -3.462297 | 2.138313  |
| H          | -2.684231 | -3.194824 | 1.733163  |
| H          | -3.549951 | -2.017809 | 2.734006  |
| C          | 3.898148  | -2.298673 | -2.482143 |
| H          | 4.714132  | -1.821301 | -3.033816 |
| H          | 3.990707  | -3.381895 | -2.615234 |
| H          | 2.952071  | -1.986773 | -2.937153 |
| O          | 1.209395  | -0.149833 | -1.506134 |
| H          | 0.758144  | 0.288202  | -2.245516 |
| H          | 2.174223  | 0.034850  | -1.521073 |
| O          | -2.160878 | 0.364506  | 2.695286  |
| H          | -1.509813 | -0.354571 | 2.616569  |
| H          | -2.699420 | 0.238219  | 1.892804  |
| O          | -0.332333 | 2.076613  | 1.636730  |
| H          | 0.524420  | 1.968928  | 2.096309  |
| H          | -1.027558 | 1.631452  | 2.179506  |
| O          | -0.424544 | -0.998001 | 0.968392  |
| H          | 0.199150  | -1.715002 | 0.767988  |
| H          | -1.262264 | -1.136484 | 0.465116  |
| C          | -0.223861 | 3.442028  | -0.860473 |
| O          | -1.206251 | 4.052266  | -0.874604 |
| O          | 0.814007  | 2.896585  | -0.861709 |
| PDMS-Mg-M4 |           |           |           |
| Si         | -3.888119 | 1.491247  | -0.920708 |
| O          | -3.228502 | 1.083647  | 0.565513  |
| Si         | -2.826423 | -0.116773 | 1.587929  |
| O          | -1.766997 | -1.209328 | 0.805642  |
| Mg         | 0.253153  | -1.463904 | 0.215202  |
| O          | 1.984574  | -1.880732 | -0.648956 |
| Si         | 3.343451  | -1.018992 | -0.592549 |
| O          | 2.962647  | 0.399133  | 0.305282  |

|            |           |           |           |
|------------|-----------|-----------|-----------|
| Si         | 3.681237  | 1.907263  | 0.490336  |
| C          | 4.730584  | -1.866866 | 0.333979  |
| H          | 5.643256  | -1.262440 | 0.358495  |
| H          | 4.430346  | -2.069861 | 1.367826  |
| H          | 4.976503  | -2.825244 | -0.134520 |
| C          | 3.895945  | -0.424106 | -2.281789 |
| H          | 3.085832  | 0.112520  | -2.789458 |
| H          | 4.766520  | 0.240028  | -2.227693 |
| H          | 4.169457  | -1.272977 | -2.917358 |
| C          | -1.747614 | 0.608756  | 2.932912  |
| H          | -1.287997 | -0.173391 | 3.548623  |
| H          | -0.975916 | 1.243688  | 2.480642  |
| H          | -2.332476 | 1.248273  | 3.600559  |
| C          | -4.296955 | -1.033983 | 2.256749  |
| H          | -4.855790 | -1.481183 | 1.431038  |
| H          | -3.984070 | -1.834539 | 2.934751  |
| H          | -4.960024 | -0.359278 | 2.807386  |
| C          | 5.533181  | 1.719033  | 0.695764  |
| H          | 5.772548  | 1.085706  | 1.556202  |
| H          | 5.992085  | 1.269348  | -0.191485 |
| H          | 6.005913  | 2.694371  | 0.853528  |
| C          | 3.261263  | 2.956543  | -1.003740 |
| H          | 3.719344  | 2.561931  | -1.916139 |
| H          | 2.177745  | 2.995771  | -1.164431 |
| H          | 3.612333  | 3.985536  | -0.870874 |
| C          | -2.670385 | 1.079032  | -2.283913 |
| H          | -1.696459 | 1.531912  | -2.072904 |
| H          | -2.540213 | -0.002643 | -2.387163 |
| H          | -3.024359 | 1.467112  | -3.245550 |
| C          | -4.142857 | 3.349046  | -0.849750 |
| H          | -4.822577 | 3.622694  | -0.036450 |
| H          | -3.193147 | 3.867332  | -0.683001 |
| H          | -4.570874 | 3.723520  | -1.785882 |
| C          | 2.889795  | 2.623506  | 2.032552  |
| H          | 3.274690  | 3.624243  | 2.253512  |
| H          | 1.804138  | 2.713263  | 1.906099  |
| H          | 3.082523  | 1.994278  | 2.908492  |
| C          | -5.526030 | 0.615080  | -1.147256 |
| H          | -6.197601 | 0.816924  | -0.305610 |
| H          | -6.025577 | 0.952865  | -2.061984 |
| H          | -5.367664 | -0.464316 | -1.216952 |
| O          | 0.537887  | -0.929476 | -2.873074 |
| H          | 1.164132  | -1.467032 | -2.341080 |
| H          | -0.298154 | -1.421207 | -2.779568 |
| O          | 1.094575  | -0.702254 | 1.942470  |
| H          | 0.549862  | -0.127342 | 2.500274  |
| H          | 1.858643  | -0.176324 | 1.612124  |
| O          | 0.430201  | -3.474855 | 0.850213  |
| H          | 1.298692  | -3.501758 | 0.398355  |
| H          | -0.193796 | -3.884979 | 0.226758  |
| O          | 0.244360  | 0.464107  | -0.621360 |
| H          | 0.266925  | 0.178018  | -1.579255 |
| H          | 1.157843  | 0.752548  | -0.435074 |
| C          | -2.189713 | -1.772195 | -0.433833 |
| O          | -3.371489 | -1.751859 | -0.705603 |
| O          | -1.172981 | -2.197386 | -1.070729 |
| PDMS-Mg-M5 |           |           |           |
| Si         | -4.014514 | 1.142870  | -1.170996 |

|    |           |           |           |
|----|-----------|-----------|-----------|
| O  | -3.023564 | 0.312023  | -0.106968 |
| Si | -3.167544 | -0.454568 | 1.426135  |
| O  | -1.827913 | -1.307850 | 1.615362  |
| Mg | -0.238093 | -1.437979 | 0.463131  |
| O  | 2.889434  | -0.500552 | -1.924878 |
| Si | 3.947657  | -0.710506 | -0.615102 |
| O  | 3.305255  | 0.145613  | 0.670282  |
| Si | 3.126513  | 1.812481  | 0.875445  |
| C  | 4.210165  | -2.476123 | -0.102017 |
| H  | 5.146623  | -2.582077 | 0.454997  |
| H  | 3.381386  | -2.825457 | 0.517572  |
| H  | 4.264125  | -3.122791 | -0.983523 |
| C  | 5.523811  | 0.091876  | -1.208230 |
| H  | 5.356399  | 1.119643  | -1.545128 |
| H  | 6.280464  | 0.107589  | -0.417143 |
| H  | 5.933123  | -0.467775 | -2.055554 |
| C  | -3.358495 | 0.939221  | 2.666164  |
| H  | -3.363715 | 0.548885  | 3.688890  |
| H  | -2.515651 | 1.635191  | 2.583585  |
| H  | -4.282097 | 1.508656  | 2.518197  |
| C  | -4.737421 | -1.478226 | 1.319505  |
| H  | -4.665271 | -2.206096 | 0.503210  |
| H  | -4.913010 | -2.033717 | 2.246268  |
| H  | -5.620370 | -0.854258 | 1.135750  |
| C  | 4.765804  | 2.523140  | 1.444281  |
| H  | 5.117296  | 2.014887  | 2.348053  |
| H  | 5.540572  | 2.421597  | 0.677699  |
| H  | 4.665386  | 3.589034  | 1.676377  |
| C  | 2.584810  | 2.585416  | -0.742375 |
| H  | 3.356969  | 2.507161  | -1.514313 |
| H  | 1.686947  | 2.097528  | -1.133002 |
| H  | 2.357959  | 3.647882  | -0.600262 |
| C  | -2.836709 | 2.101346  | -2.271030 |
| H  | -2.249482 | 2.819402  | -1.687778 |
| H  | -2.133532 | 1.430345  | -2.779338 |
| H  | -3.371178 | 2.661613  | -3.045054 |
| C  | -5.162565 | 2.290016  | -0.233951 |
| H  | -5.833604 | 1.731227  | 0.427606  |
| H  | -4.598151 | 2.999013  | 0.380467  |
| H  | -5.785146 | 2.866100  | -0.926983 |
| C  | 1.825357  | 2.040483  | 2.204392  |
| H  | 1.734842  | 3.099143  | 2.470130  |
| H  | 0.850619  | 1.700738  | 1.839239  |
| H  | 2.088333  | 1.497510  | 3.119667  |
| C  | -4.988384 | -0.106566 | -2.173057 |
| H  | -5.674024 | -0.677661 | -1.538499 |
| H  | -5.582117 | 0.385425  | -2.950839 |
| H  | -4.319077 | -0.819503 | -2.667747 |
| O  | -1.388052 | -1.704613 | -1.317122 |
| H  | -2.124482 | -1.083753 | -1.156537 |
| H  | -0.774044 | -1.275532 | -1.963206 |
| O  | 1.138374  | -1.142628 | 1.964467  |
| H  | 0.793634  | -0.538297 | 2.637862  |
| H  | 1.936717  | -0.725515 | 1.569324  |
| O  | -0.563025 | -3.497449 | 0.776466  |
| H  | -0.933937 | -3.758283 | -0.082357 |
| H  | -1.331845 | -3.225111 | 1.321428  |
| O  | -0.295540 | 0.648124  | -0.040864 |
| H  | -1.258369 | 0.835194  | -0.039661 |

|   |           |           |           |
|---|-----------|-----------|-----------|
| H | -0.024563 | 0.646094  | -0.984741 |
| C | 1.591323  | -0.822006 | -1.700024 |
| O | 0.718543  | -0.305108 | -2.424800 |
| O | 1.386943  | -1.599264 | -0.717061 |

#### PDMS-MgOH2-M1

|    |           |           |           |
|----|-----------|-----------|-----------|
| Si | -3.338495 | 2.050635  | 0.171570  |
| O  | -3.094141 | 0.534529  | 0.845848  |
| Si | -3.131338 | -1.066575 | 0.531431  |
| O  | -1.562237 | -1.651183 | 0.265489  |
| Si | -0.094440 | -1.424881 | 1.063935  |
| O  | 0.855018  | -1.572079 | -0.313102 |
| Si | 2.355469  | -1.064741 | -0.891751 |
| O  | 2.749258  | 0.325274  | -0.099000 |
| Si | 2.866936  | 1.974026  | -0.428702 |
| C  | 3.597910  | -2.389456 | -0.477747 |
| H  | 4.619943  | -2.045449 | -0.667452 |
| H  | 3.524302  | -2.691523 | 0.571133  |
| H  | 3.418709  | -3.275576 | -1.094741 |
| C  | 2.120650  | -0.834202 | -2.722745 |
| H  | 1.351952  | -0.080875 | -2.926721 |
| H  | 3.047238  | -0.514064 | -3.211956 |
| H  | 1.789873  | -1.773889 | -3.181379 |
| C  | -0.011588 | 0.287666  | 1.755995  |
| H  | 0.956371  | 0.492224  | 2.219674  |
| H  | -0.160468 | 0.966809  | 0.908486  |
| H  | -0.809795 | 0.474020  | 2.481737  |
| C  | 0.198910  | -2.839477 | 2.228732  |
| H  | 0.118914  | -3.789070 | 1.691249  |
| H  | 1.190422  | -2.777062 | 2.684887  |
| H  | -0.546206 | -2.838160 | 3.031297  |
| C  | -3.739118 | -1.938161 | 2.064043  |
| H  | -3.675435 | -3.025258 | 1.954754  |
| H  | -3.136143 | -1.646612 | 2.931721  |
| H  | -4.777595 | -1.674769 | 2.286229  |
| C  | -4.066343 | -1.513634 | -1.014877 |
| H  | -3.631872 | -1.021139 | -1.891802 |
| H  | -4.036268 | -2.595342 | -1.183533 |
| H  | -5.116149 | -1.210002 | -0.948713 |
| C  | 2.423265  | 2.906514  | 1.135537  |
| H  | 1.355134  | 2.824636  | 1.359317  |
| H  | 2.990350  | 2.554765  | 2.003233  |
| H  | 2.653168  | 3.969963  | 1.003763  |
| C  | 4.643659  | 2.311437  | -0.919326 |
| H  | 5.332411  | 2.029395  | -0.117200 |
| H  | 4.913786  | 1.740655  | -1.814834 |
| H  | 4.796219  | 3.372562  | -1.143692 |
| C  | -1.745895 | 3.032173  | 0.191372  |
| H  | -1.332603 | 3.104150  | 1.203373  |
| H  | -1.017635 | 2.542505  | -0.461501 |
| H  | -1.921461 | 4.050685  | -0.173243 |
| C  | -4.600060 | 2.887275  | 1.284948  |
| H  | -5.543350 | 2.331332  | 1.302353  |
| H  | -4.232378 | 2.953446  | 2.314137  |
| H  | -4.817264 | 3.904215  | 0.940277  |
| C  | 1.676818  | 2.430725  | -1.799911 |
| H  | 1.430923  | 3.497507  | -1.750410 |
| H  | 2.096800  | 2.228590  | -2.790985 |
| H  | 0.746164  | 1.856614  | -1.696059 |

|    |           |           |           |
|----|-----------|-----------|-----------|
| C  | -4.031819 | 1.901580  | -1.562388 |
| H  | -5.001220 | 1.391992  | -1.572323 |
| H  | -4.173306 | 2.894500  | -2.003698 |
| H  | -3.331767 | 1.338215  | -2.184303 |
| Mg | -0.780036 | -1.440516 | -1.689136 |
| O  | -1.079273 | 0.414473  | -1.696850 |
| H  | -1.133198 | 0.894711  | -2.532139 |
| O  | -0.750440 | -2.765063 | -2.959361 |
| H  | -0.958530 | -3.693397 | -2.823367 |
| C  | 3.877179  | -0.258188 | 2.254704  |
| O  | 4.741684  | 0.496627  | 2.077324  |
| O  | 3.028274  | -1.024964 | 2.478561  |

PDMS-MgOH2-M6

|    |           |           |           |
|----|-----------|-----------|-----------|
| Si | -3.395555 | 1.892515  | 0.185915  |
| O  | -2.571012 | 0.465266  | 0.484819  |
| Si | -2.662668 | -1.156075 | 0.278706  |
| O  | -1.061484 | -1.706497 | 0.379687  |
| Si | 0.185516  | -1.405537 | 1.474943  |
| O  | 1.411817  | -1.566223 | 0.341987  |
| Si | 2.947358  | -0.935024 | 0.017575  |
| O  | 2.985787  | 0.594275  | 0.602259  |
| Si | 3.247062  | 2.193079  | 0.195166  |
| C  | 4.164400  | -1.983399 | 0.955371  |
| H  | 5.194568  | -1.667976 | 0.763079  |
| H  | 3.988997  | -1.907070 | 2.033636  |
| H  | 4.065493  | -3.034335 | 0.666651  |
| C  | 3.110607  | -1.054157 | -1.831172 |
| H  | 2.342729  | -0.455384 | -2.333770 |
| H  | 4.092167  | -0.714911 | -2.177265 |
| H  | 2.991378  | -2.098835 | -2.146543 |
| C  | 0.099311  | 0.274765  | 2.250922  |
| H  | 0.993998  | 0.461724  | 2.853863  |
| H  | 0.037854  | 1.036535  | 1.471641  |
| H  | -0.783483 | 0.363806  | 2.892752  |
| C  | 0.281617  | -2.812421 | 2.681120  |
| H  | 0.345364  | -3.756795 | 2.131339  |
| H  | 1.164915  | -2.727015 | 3.322312  |
| H  | -0.602258 | -2.846605 | 3.326463  |
| C  | -3.578967 | -1.924557 | 1.709846  |
| H  | -3.527860 | -3.017217 | 1.672405  |
| H  | -3.152794 | -1.594552 | 2.664283  |
| H  | -4.634563 | -1.633531 | 1.705144  |
| C  | -3.285646 | -1.667077 | -1.394314 |
| H  | -2.825657 | -1.060886 | -2.182026 |
| H  | -3.056133 | -2.721903 | -1.585910 |
| H  | -4.372135 | -1.546521 | -1.459162 |
| C  | 1.915988  | 3.240637  | 1.001741  |
| H  | 0.948175  | 3.138974  | 0.500780  |
| H  | 1.781004  | 2.972996  | 2.054603  |
| H  | 2.192093  | 4.299938  | 0.957022  |
| C  | 4.921333  | 2.668128  | 0.893053  |
| H  | 4.947051  | 2.535138  | 1.979331  |
| H  | 5.715333  | 2.048761  | 0.462617  |
| H  | 5.159737  | 3.714745  | 0.675675  |
| C  | -2.119474 | 3.248229  | -0.029038 |
| H  | -1.359741 | 3.190327  | 0.760494  |
| H  | -1.645974 | 3.167540  | -1.012719 |
| H  | -2.582562 | 4.238220  | 0.041577  |

|    |           |           |           |
|----|-----------|-----------|-----------|
| C  | -4.425838 | 2.239746  | 1.718195  |
| H  | -5.142818 | 1.432238  | 1.902866  |
| H  | -3.790718 | 2.330867  | 2.605765  |
| H  | -4.993530 | 3.170699  | 1.614596  |
| C  | 3.222841  | 2.421846  | -1.663280 |
| H  | 3.346861  | 3.481363  | -1.913977 |
| H  | 4.030666  | 1.869763  | -2.154510 |
| H  | 2.271697  | 2.081463  | -2.083843 |
| C  | -4.492312 | 1.699531  | -1.314958 |
| H  | -5.267886 | 0.942841  | -1.150260 |
| H  | -4.997595 | 2.642953  | -1.549343 |
| H  | -3.887552 | 1.407076  | -2.178407 |
| Mg | 0.196131  | -2.188495 | -1.242896 |
| O  | 0.238274  | 0.852182  | -1.019124 |
| H  | -0.133087 | 1.706047  | -0.740430 |
| O  | 0.595578  | -3.945081 | -1.543980 |
| H  | 0.367677  | -4.432191 | -2.340868 |
| C  | -0.591626 | 0.407054  | -2.037544 |
| O  | -1.495943 | 1.128596  | -2.423262 |
| O  | -0.279562 | -0.766479 | -2.435766 |

PDMS-Mg-PDMS-MI

|    |           |           |           |
|----|-----------|-----------|-----------|
| Si | 5.311287  | -1.966226 | 0.586692  |
| O  | 3.696850  | -1.924926 | 0.035499  |
| Si | 2.605563  | -3.002705 | -0.515121 |
| O  | 1.422435  | -2.006724 | -1.289530 |
| Si | 1.523609  | -0.925684 | -2.617004 |
| O  | 0.255193  | 0.022028  | -1.975099 |
| Si | -0.329758 | 1.625114  | -2.231038 |
| O  | 0.955214  | 2.566928  | -1.923163 |
| Si | 1.490630  | 4.169257  | -2.147238 |
| C  | -0.926066 | 1.717563  | -3.983578 |
| H  | -1.414432 | 2.676868  | -4.185932 |
| H  | -0.086153 | 1.628565  | -4.682230 |
| H  | -1.646617 | 0.925488  | -4.214295 |
| C  | -1.618929 | 1.741199  | -0.888963 |
| H  | -1.127020 | 1.705146  | 0.092979  |
| H  | -2.160697 | 2.693086  | -0.930715 |
| H  | -2.366282 | 0.937360  | -0.938116 |
| C  | 3.124300  | -0.009960 | -2.679590 |
| H  | 3.120712  | 0.689078  | -3.523225 |
| H  | 3.295438  | 0.560972  | -1.763257 |
| H  | 3.962978  | -0.700330 | -2.822098 |
| C  | 0.996083  | -1.763078 | -4.175927 |
| H  | 0.020814  | -2.246614 | -4.066807 |
| H  | 0.929556  | -1.044091 | -4.999466 |
| H  | 1.724265  | -2.526701 | -4.470299 |
| C  | 3.276972  | -4.162534 | -1.794510 |
| H  | 2.483073  | -4.763967 | -2.248780 |
| H  | 3.796486  | -3.617796 | -2.591587 |
| H  | 4.001957  | -4.855522 | -1.353752 |
| C  | 1.619333  | -3.769153 | 0.864755  |
| H  | 1.214415  | -2.989999 | 1.525576  |
| H  | 0.790515  | -4.380826 | 0.490517  |
| H  | 2.245712  | -4.414146 | 1.490200  |
| C  | 2.809210  | 4.433743  | -0.851495 |
| H  | 2.400680  | 4.380601  | 0.163412  |
| H  | 3.598611  | 3.679438  | -0.943136 |
| H  | 3.277336  | 5.416511  | -0.968296 |

|    |           |           |           |
|----|-----------|-----------|-----------|
| C  | 2.178188  | 4.284270  | -3.879123 |
| H  | 3.009150  | 3.586668  | -4.027015 |
| H  | 1.412256  | 4.068474  | -4.632030 |
| H  | 2.557015  | 5.291441  | -4.081871 |
| C  | 5.625254  | -0.285642 | 1.335971  |
| H  | 5.518432  | 0.506251  | 0.586657  |
| H  | 4.934819  | -0.074456 | 2.159584  |
| H  | 6.643344  | -0.226842 | 1.734411  |
| C  | 6.410560  | -2.281943 | -0.890010 |
| H  | 6.216807  | -3.257691 | -1.348058 |
| H  | 6.282255  | -1.511455 | -1.657786 |
| H  | 7.464343  | -2.269678 | -0.591794 |
| C  | -0.003010 | 5.271495  | -1.917561 |
| H  | 0.268639  | 6.328340  | -2.008078 |
| H  | -0.766689 | 5.072836  | -2.679290 |
| H  | -0.458530 | 5.131669  | -0.931086 |
| C  | 5.413537  | -3.352389 | 1.837746  |
| H  | 5.176124  | -4.322492 | 1.383954  |
| H  | 6.424337  | -3.434578 | 2.250557  |
| H  | 4.729299  | -3.194056 | 2.678631  |
| Mg | -0.054541 | -1.062476 | -0.331186 |
| Si | -5.366316 | -0.143532 | -1.230389 |
| O  | -4.241478 | -1.036984 | -0.306748 |
| Si | -3.092274 | -2.184503 | -0.403257 |
| O  | -1.768873 | -1.605154 | 0.540228  |
| Si | -1.463244 | -0.870567 | 2.065839  |
| O  | 0.111171  | -0.421617 | 1.527226  |
| Si | 1.373333  | 0.467714  | 2.315474  |
| O  | 0.569305  | 1.583309  | 3.182857  |
| Si | 0.503745  | 3.273549  | 3.343623  |
| C  | 2.296675  | -0.740518 | 3.376522  |
| H  | 3.067431  | -0.225124 | 3.959597  |
| H  | 1.641014  | -1.254523 | 4.086300  |
| H  | 2.795976  | -1.492113 | 2.753309  |
| C  | 2.371874  | 1.115833  | 0.889537  |
| H  | 1.771669  | 1.666173  | 0.153017  |
| H  | 3.169645  | 1.785678  | 1.230282  |
| H  | 2.863094  | 0.266730  | 0.394750  |
| C  | -2.526552 | 0.623274  | 2.337885  |
| H  | -1.913019 | 1.528478  | 2.344078  |
| H  | -3.281378 | 0.708652  | 1.548246  |
| H  | -3.036452 | 0.554055  | 3.303204  |
| C  | -1.287809 | -2.103098 | 3.428798  |
| H  | -0.577281 | -2.893200 | 3.166700  |
| H  | -0.921788 | -1.600143 | 4.331584  |
| H  | -2.246265 | -2.565112 | 3.677314  |
| C  | -3.594427 | -3.853083 | 0.220048  |
| H  | -2.821587 | -4.595169 | -0.006727 |
| H  | -3.766597 | -3.861457 | 1.298792  |
| H  | -4.517013 | -4.180824 | -0.270975 |
| C  | -2.283978 | -2.277177 | -2.091904 |
| H  | -2.017880 | -1.291188 | -2.494254 |
| H  | -1.382386 | -2.907807 | -2.062067 |
| H  | -2.953651 | -2.745737 | -2.821378 |
| C  | -0.638979 | 3.618025  | 4.771412  |
| H  | -1.632694 | 3.191788  | 4.598744  |
| H  | -0.247393 | 3.194772  | 5.701276  |
| H  | -0.762111 | 4.695391  | 4.922142  |
| C  | 2.241437  | 3.898089  | 3.626681  |

|   |           |           |           |
|---|-----------|-----------|-----------|
| H | 2.703370  | 3.410353  | 4.491245  |
| H | 2.887612  | 3.733624  | 2.757145  |
| H | 2.235376  | 4.975203  | 3.824788  |
| C | -5.618360 | 1.460597  | -0.309428 |
| H | -6.055460 | 1.299961  | 0.680233  |
| H | -4.675160 | 2.005292  | -0.187039 |
| H | -6.301263 | 2.111702  | -0.865593 |
| C | -6.913300 | -1.165533 | -1.404687 |
| H | -6.706984 | -2.120255 | -1.900981 |
| H | -7.372648 | -1.375833 | -0.435020 |
| H | -7.653639 | -0.636235 | -2.013910 |
| C | -0.180054 | 3.942210  | 1.723472  |
| H | -0.045485 | 5.028845  | 1.671470  |
| H | 0.342480  | 3.506254  | 0.861485  |
| H | -1.251773 | 3.740981  | 1.610831  |
| C | -4.599918 | 0.188234  | -2.912241 |
| H | -4.409192 | -0.730338 | -3.476940 |
| H | -5.291170 | 0.792822  | -3.509962 |
| H | -3.663286 | 0.752926  | -2.837328 |
| C | -5.349505 | -1.361318 | 2.227313  |
| O | -4.304735 | -1.781521 | 2.542542  |
| O | -6.385062 | -0.942954 | 1.926127  |

#### PDMS-Mg-PDMS-M3

|    |           |           |           |
|----|-----------|-----------|-----------|
| Si | 5.540996  | 0.099249  | 0.368096  |
| O  | 3.988562  | -0.607196 | 0.337913  |
| Si | 3.322747  | -2.068012 | 0.601328  |
| O  | 1.760029  | -1.971394 | -0.129107 |
| Si | 1.330071  | -1.779889 | -1.780896 |
| O  | -0.179015 | -1.097711 | -1.352029 |
| Si | -1.217005 | -0.079030 | -2.305346 |
| O  | -0.162299 | 0.516728  | -3.390156 |
| Si | 0.036391  | 1.832117  | -4.452506 |
| C  | -2.519132 | -1.173683 | -3.045406 |
| H  | -3.088854 | -0.626797 | -3.805113 |
| H  | -2.089142 | -2.056302 | -3.530079 |
| H  | -3.227492 | -1.505927 | -2.277283 |
| C  | -1.912489 | 1.171884  | -1.123098 |
| H  | -1.141222 | 1.701103  | -0.552389 |
| H  | -2.487560 | 1.925249  | -1.673684 |
| H  | -2.607895 | 0.681671  | -0.432393 |
| C  | 2.529050  | -0.698378 | -2.673245 |
| H  | 2.295544  | -0.691494 | -3.742030 |
| H  | 2.500272  | 0.331823  | -2.311054 |
| H  | 3.546375  | -1.085688 | -2.543233 |
| C  | 1.038618  | -3.444158 | -2.537429 |
| H  | 0.292063  | -4.024121 | -1.983247 |
| H  | 0.676286  | -3.340447 | -3.566132 |
| H  | 1.964194  | -4.028631 | -2.577164 |
| C  | 4.247068  | -3.444477 | -0.232623 |
| H  | 3.719455  | -4.401115 | -0.165550 |
| H  | 4.429179  | -3.223867 | -1.290940 |
| H  | 5.227619  | -3.581843 | 0.237407  |
| C  | 2.944348  | -2.346659 | 2.406441  |
| H  | 2.143479  | -1.687643 | 2.768300  |
| H  | 2.682923  | -3.384506 | 2.640118  |
| H  | 3.832712  | -2.111762 | 3.003883  |
| C  | 1.676400  | 2.621515  | -4.022257 |
| H  | 1.724843  | 2.885089  | -2.959124 |



|    |           |           |           |
|----|-----------|-----------|-----------|
| H  | 2.521134  | 1.964404  | -4.251945 |
| H  | 1.816188  | 3.544590  | -4.594790 |
| C  | 0.017686  | 1.136817  | -6.181145 |
| H  | 0.807999  | 0.391712  | -6.319285 |
| H  | -0.939916 | 0.657825  | -6.409199 |
| H  | 0.176816  | 1.927025  | -6.922024 |
| C  | 5.256690  | 1.937676  | 0.205885  |
| H  | 4.795381  | 2.184605  | -0.756429 |
| H  | 4.611372  | 2.318388  | 1.005390  |
| H  | 6.207388  | 2.477710  | 0.263820  |
| C  | 6.507661  | -0.579478 | -1.078862 |
| H  | 6.662366  | -1.660943 | -1.003179 |
| H  | 6.007053  | -0.369905 | -2.030259 |
| H  | 7.498553  | -0.115096 | -1.125695 |
| C  | -1.376849 | 3.021756  | -4.146486 |
| H  | -1.353249 | 3.835178  | -4.879400 |
| H  | -2.354637 | 2.534331  | -4.242265 |
| H  | -1.314822 | 3.479022  | -3.152430 |
| C  | 6.313682  | -0.369307 | 2.004820  |
| H  | 6.415300  | -1.456613 | 2.107529  |
| H  | 7.319435  | 0.053541  | 2.097557  |
| H  | 5.725582  | -0.000039 | 2.852335  |
| Mg | -0.040948 | -1.349073 | 0.629065  |
| Si | -5.706156 | -0.372169 | -0.184309 |
| O  | -4.139051 | -0.742572 | 0.363313  |
| Si | -3.352655 | -1.899701 | 1.196748  |
| O  | -1.826388 | -1.185263 | 1.552787  |
| Si | -1.407554 | 0.129590  | 2.564985  |
| O  | 0.121357  | 0.270520  | 1.791251  |
| Si | 1.150860  | 1.663225  | 1.728770  |
| O  | 0.118273  | 2.848295  | 2.156963  |
| Si | -0.040370 | 4.503519  | 1.789307  |
| C  | 2.512556  | 1.396050  | 2.959231  |
| H  | 3.083905  | 2.320828  | 3.097138  |
| H  | 2.121334  | 1.102557  | 3.938832  |
| H  | 3.206842  | 0.623112  | 2.610790  |
| C  | 1.757395  | 1.767547  | -0.027394 |
| H  | 0.959027  | 1.658806  | -0.770137 |
| H  | 2.243167  | 2.734769  | -0.205269 |
| H  | 2.513638  | 0.993265  | -0.195267 |
| C  | -2.591943 | 1.535054  | 2.384163  |
| H  | -2.419825 | 2.261392  | 3.183701  |
| H  | -2.490041 | 2.048900  | 1.425840  |
| H  | -3.618884 | 1.159210  | 2.466909  |
| C  | -1.134198 | -0.453760 | 4.298401  |
| H  | -0.503295 | -1.348396 | 4.328335  |
| H  | -0.646518 | 0.326960  | 4.892651  |
| H  | -2.082973 | -0.690934 | 4.790994  |
| C  | -4.162086 | -2.303925 | 2.816099  |
| H  | -3.532242 | -2.951199 | 3.435233  |
| H  | -4.388582 | -1.395490 | 3.386727  |
| H  | -5.111959 | -2.825906 | 2.656003  |
| C  | -2.948060 | -3.363754 | 0.118139  |
| H  | -2.219092 | -3.101721 | -0.661150 |
| H  | -2.560596 | -4.207365 | 0.696627  |
| H  | -3.851513 | -3.706481 | -0.398021 |
| C  | -1.290305 | 5.195368  | 2.984098  |
| H  | -2.285106 | 4.768909  | 2.819430  |
| H  | -0.999834 | 5.000134  | 4.021088  |

|   |           |           |           |
|---|-----------|-----------|-----------|
| H | -1.376606 | 6.280367  | 2.864688  |
| C | 1.653764  | 5.271128  | 1.986611  |
| H | 2.012362  | 5.175246  | 3.016849  |
| H | 2.396280  | 4.808033  | 1.325046  |
| H | 1.632811  | 6.338948  | 1.745601  |
| C | -5.480519 | 1.018146  | -1.411026 |
| H | -5.045965 | 1.900850  | -0.929643 |
| H | -4.824832 | 0.719385  | -2.236742 |
| H | -6.441215 | 1.316326  | -1.842902 |
| C | -6.714926 | 0.155740  | 1.295884  |
| H | -6.813763 | -0.650828 | 2.030279  |
| H | -6.269211 | 1.021222  | 1.797770  |
| H | -7.727339 | 0.441735  | 0.991714  |
| C | -0.640743 | 4.614284  | 0.015484  |
| H | -0.746047 | 5.660628  | -0.290395 |
| H | 0.057567  | 4.137995  | -0.683501 |
| H | -1.621501 | 4.139236  | -0.102427 |
| C | -6.389803 | -1.922332 | -0.976257 |
| H | -6.458190 | -2.746426 | -0.255866 |
| H | -7.400207 | -1.752215 | -1.362316 |
| H | -5.771215 | -2.254981 | -1.817315 |
| C | 0.648139  | -4.268545 | 1.117173  |
| O | 1.355006  | -5.133533 | 0.850822  |
| O | -0.083763 | -3.386645 | 1.394520  |

#### PDMS-TiOH-MI

|    |           |           |           |
|----|-----------|-----------|-----------|
| Si | 3.659887  | 1.093536  | -0.321134 |
| O  | 2.305345  | 0.209758  | 0.100861  |
| Si | 1.595072  | -0.120655 | 1.572861  |
| O  | -0.011706 | -0.384059 | 1.269838  |
| Ti | -0.861273 | -1.263811 | -0.059833 |
| O  | -2.485698 | -2.070263 | 0.297342  |
| Si | -3.632616 | -0.876838 | 0.351867  |
| O  | -2.559950 | 0.397506  | 0.142519  |
| Si | -2.449660 | 1.964590  | -0.471415 |
| C  | -4.825545 | -0.960722 | -1.076832 |
| H  | -5.484466 | -0.085295 | -1.098561 |
| H  | -4.271555 | -0.996529 | -2.020634 |
| H  | -5.456106 | -1.853327 | -1.016325 |
| C  | -4.466517 | -0.753471 | 2.010414  |
| H  | -3.713165 | -0.666564 | 2.799259  |
| H  | -5.116085 | 0.127027  | 2.058685  |
| H  | -5.077807 | -1.637463 | 2.216502  |
| O  | -0.695325 | -0.461877 | -1.677441 |
| H  | 0.077276  | -0.737902 | -2.199475 |
| O  | 0.221456  | -2.708620 | -0.257751 |
| H  | -0.151846 | -3.582889 | -0.441267 |
| C  | 2.353527  | -1.656090 | 2.308160  |
| H  | 1.940387  | -1.852027 | 3.303166  |
| H  | 2.138644  | -2.517189 | 1.668450  |
| H  | 3.440897  | -1.561019 | 2.399444  |
| C  | 1.759115  | 1.352115  | 2.715655  |
| H  | 1.353959  | 2.258519  | 2.255971  |
| H  | 1.208028  | 1.167730  | 3.643701  |
| H  | 2.804943  | 1.543868  | 2.981823  |
| C  | -3.731753 | 2.978075  | 0.454653  |
| H  | -4.742576 | 2.593900  | 0.273090  |
| H  | -3.549125 | 2.947355  | 1.533879  |
| H  | -3.718170 | 4.026842  | 0.139449  |

|   |           |           |           |
|---|-----------|-----------|-----------|
| C | -0.717627 | 2.557064  | -0.097976 |
| H | -0.556038 | 2.562667  | 0.984683  |
| H | 0.020531  | 1.883717  | -0.547024 |
| H | -0.550871 | 3.570580  | -0.479257 |
| C | 3.318670  | 2.922829  | -0.075971 |
| H | 2.378254  | 3.207167  | -0.560291 |
| H | 3.241390  | 3.183930  | 0.983997  |
| H | 4.120194  | 3.529520  | -0.511512 |
| C | 4.028917  | 0.760027  | -2.128956 |
| H | 4.409874  | -0.253859 | -2.291099 |
| H | 3.137641  | 0.891930  | -2.750070 |
| H | 4.796176  | 1.455464  | -2.486736 |
| C | -2.832605 | 1.944484  | -2.302140 |
| H | -3.871870 | 1.654148  | -2.490583 |
| H | -2.676902 | 2.933961  | -2.745890 |
| H | -2.174620 | 1.227617  | -2.801192 |
| C | 5.104310  | 0.531848  | 0.739374  |
| H | 5.266080  | -0.544801 | 0.616728  |
| H | 6.028556  | 1.047448  | 0.456950  |
| H | 4.929440  | 0.725660  | 1.803742  |
| C | 2.535168  | -2.049767 | -1.545762 |
| O | 3.243938  | -2.494208 | -0.741066 |
| O | 1.881366  | -1.619932 | -2.411490 |

PDMS-TiOH-M4

|    |           |           |           |
|----|-----------|-----------|-----------|
| Si | -4.180965 | -0.653326 | -0.134708 |
| O  | -3.038666 | 0.583734  | -0.302168 |
| Si | -1.944158 | 1.448919  | 0.577580  |
| O  | -0.542324 | 0.452810  | 0.574772  |
| Ti | 0.565515  | -0.265472 | -1.292808 |
| O  | 1.234837  | 1.459733  | -1.408430 |
| Si | 2.487154  | 1.536476  | -0.340859 |
| O  | 2.340679  | -0.071069 | 0.176982  |
| Si | 3.426421  | -1.208240 | 0.819448  |
| C  | 4.124386  | 1.818904  | -1.182875 |
| H  | 4.971697  | 1.691646  | -0.500470 |
| H  | 4.235533  | 1.112174  | -2.011543 |
| H  | 4.174948  | 2.832500  | -1.593730 |
| C  | 2.172268  | 2.678979  | 1.096059  |
| H  | 1.262528  | 2.362092  | 1.616637  |
| H  | 3.000864  | 2.657791  | 1.811932  |
| H  | 2.041206  | 3.713053  | 0.761240  |
| O  | 1.597505  | -1.311303 | -2.329828 |
| H  | 1.196465  | -1.844929 | -3.032018 |
| O  | -0.953863 | -0.164600 | -2.210729 |
| H  | -1.836462 | 0.051113  | -1.856093 |
| C  | -1.442250 | 2.963477  | -0.365282 |
| H  | -0.659193 | 3.511278  | 0.168895  |
| H  | -1.043675 | 2.694203  | -1.347879 |
| H  | -2.298835 | 3.632073  | -0.498095 |
| C  | -2.471335 | 1.769531  | 2.329174  |
| H  | -2.573129 | 0.829575  | 2.876130  |
| H  | -1.717004 | 2.381201  | 2.835804  |
| H  | -3.422668 | 2.309952  | 2.364733  |
| C  | 4.376050  | -0.303980 | 2.164995  |
| H  | 4.931974  | 0.553640  | 1.768692  |
| H  | 3.695794  | 0.062995  | 2.941108  |
| H  | 5.101994  | -0.969096 | 2.644870  |
| C  | 2.453177  | -2.628922 | 1.532817  |

|   |           |           |           |
|---|-----------|-----------|-----------|
| H | 1.715355  | -2.282984 | 2.263806  |
| H | 1.909794  | -3.168557 | 0.753071  |
| H | 3.132132  | -3.326982 | 2.035815  |
| C | -3.408131 | -2.223475 | -0.796017 |
| H | -3.058261 | -2.100853 | -1.826882 |
| H | -2.554839 | -2.533065 | -0.183803 |
| H | -4.141351 | -3.037955 | -0.787639 |
| C | -5.639783 | -0.133465 | -1.188069 |
| H | -6.076020 | 0.802195  | -0.824139 |
| H | -5.336994 | 0.019904  | -2.228914 |
| H | -6.424149 | -0.897669 | -1.176024 |
| C | 4.558490  | -1.765458 | -0.561465 |
| H | 5.144145  | -2.640878 | -0.260959 |
| H | 3.955835  | -2.033155 | -1.435748 |
| H | 5.258685  | -0.977436 | -0.857138 |
| C | -4.677021 | -0.840732 | 1.659121  |
| H | -5.057637 | 0.096192  | 2.079321  |
| H | -5.470548 | -1.591185 | 1.748084  |
| H | -3.824253 | -1.174968 | 2.257607  |
| C | -0.681077 | -0.906731 | 0.919765  |
| O | -0.006415 | -1.601635 | 0.073253  |
| O | -1.369529 | -1.247150 | 1.849313  |

PDMS-TiOH-M6

|    |           |           |           |
|----|-----------|-----------|-----------|
| Si | -3.554918 | -0.496015 | -0.837586 |
| O  | -2.091931 | -0.853139 | -0.030457 |
| Si | -1.485759 | -1.792777 | 1.234832  |
| O  | -0.180388 | -0.796920 | 1.499804  |
| Ti | -0.300395 | 0.483939  | 0.175400  |
| O  | 1.070474  | 1.592768  | 0.602435  |
| Si | 2.731033  | 1.371890  | 0.581135  |
| O  | 3.022611  | 0.296730  | -0.649898 |
| Si | 3.585199  | -1.278324 | -0.821620 |
| C  | 3.527064  | 3.001808  | 0.170663  |
| H  | 4.616758  | 2.907999  | 0.130034  |
| H  | 3.182874  | 3.361459  | -0.804034 |
| H  | 3.279332  | 3.760727  | 0.919534  |
| C  | 3.234965  | 0.663225  | 2.230399  |
| H  | 4.256316  | 0.267277  | 2.220416  |
| H  | 3.179117  | 1.431585  | 3.008355  |
| H  | 2.549516  | -0.144286 | 2.509095  |
| O  | 0.268981  | -0.123129 | -1.413798 |
| H  | 1.183582  | 0.118447  | -1.654943 |
| O  | -0.629059 | 3.818511  | 0.102161  |
| H  | 0.091732  | 3.227686  | 0.399582  |
| C  | -2.673810 | -1.833879 | 2.664511  |
| H  | -2.248242 | -2.375330 | 3.515183  |
| H  | -2.907045 | -0.815518 | 2.990614  |
| H  | -3.610932 | -2.329231 | 2.386745  |
| C  | -0.982350 | -3.466507 | 0.601617  |
| H  | -0.370588 | -3.346244 | -0.298605 |
| H  | -0.395342 | -4.014783 | 1.345318  |
| H  | -1.856681 | -4.072998 | 0.343026  |
| C  | 5.457609  | -1.244951 | -0.749823 |
| H  | 5.869890  | -0.611667 | -1.541620 |
| H  | 5.810620  | -0.854307 | 0.210935  |
| H  | 5.873881  | -2.250769 | -0.870708 |
| C  | 2.879963  | -2.357385 | 0.541469  |
| H  | 3.425926  | -2.239223 | 1.482964  |

|   |           |           |           |
|---|-----------|-----------|-----------|
| H | 1.828427  | -2.109537 | 0.731085  |
| H | 2.933177  | -3.413839 | 0.254460  |
| C | -3.095362 | 0.440589  | -2.383255 |
| H | -2.981594 | 1.505702  | -2.156137 |
| H | -2.149683 | 0.067078  | -2.790248 |
| H | -3.867847 | 0.335378  | -3.152397 |
| C | -4.650836 | 0.498817  | 0.300215  |
| H | -4.768183 | 0.021633  | 1.279055  |
| H | -4.225222 | 1.497884  | 0.437808  |
| H | -5.649108 | 0.613033  | -0.136880 |
| C | 2.984544  | -1.863420 | -2.495258 |
| H | 3.395809  | -2.850841 | -2.730867 |
| H | 1.892067  | -1.941604 | -2.518274 |
| H | 3.293841  | -1.175275 | -3.288903 |
| C | -4.299838 | -2.179762 | -1.207861 |
| H | -5.253986 | -2.085964 | -1.736832 |
| H | -3.625880 | -2.775543 | -1.832573 |
| H | -4.491769 | -2.741416 | -0.285601 |
| C | -1.741281 | 3.102412  | -0.108224 |
| O | -1.612311 | 1.794722  | 0.159580  |
| O | -2.767608 | 3.589618  | -0.495547 |

CO2

|   |           |           |           |
|---|-----------|-----------|-----------|
| C | 0.000000  | -0.000081 | 0.000000  |
| O | 0.001302  | 0.000031  | 1.162812  |
| O | -0.001302 | 0.000029  | -1.162812 |

(H-profile)PDMS-Mg

|    |           |           |           |
|----|-----------|-----------|-----------|
| Si | -3.407606 | -1.201727 | 1.182063  |
| O  | -2.633360 | -0.724698 | -0.214875 |
| Si | -2.757903 | 0.386594  | -1.493649 |
| O  | -1.425672 | 1.290757  | -1.498227 |
| Mg | 0.006132  | 1.339006  | -0.129081 |
| O  | 1.369360  | 1.356823  | 1.297822  |
| Si | 2.914374  | 0.925849  | 1.172112  |
| O  | 3.093118  | 0.030716  | -0.261850 |
| Si | 3.370136  | -1.513731 | -0.819956 |
| C  | 4.081693  | 2.375689  | 0.961202  |
| H  | 5.119552  | 2.043503  | 0.853313  |
| H  | 3.817532  | 2.943295  | 0.062056  |
| H  | 4.027752  | 3.058387  | 1.814991  |
| C  | 3.477821  | -0.168792 | 2.592022  |
| H  | 2.766935  | -0.981619 | 2.776084  |
| H  | 4.461055  | -0.614873 | 2.402391  |
| H  | 3.551741  | 0.415271  | 3.515560  |
| C  | -2.921132 | -0.675711 | -3.029229 |
| H  | -2.989659 | -0.064122 | -3.934535 |
| H  | -2.047875 | -1.329175 | -3.132156 |
| H  | -3.810172 | -1.313631 | -2.981396 |
| C  | -4.327690 | 1.383526  | -1.229344 |
| H  | -4.252907 | 2.013593  | -0.336581 |
| H  | -4.506992 | 2.042279  | -2.085861 |
| H  | -5.208819 | 0.741035  | -1.117089 |
| C  | 5.207709  | -1.713661 | -1.138776 |
| H  | 5.565964  | -0.961943 | -1.849217 |
| H  | 5.778632  | -1.594055 | -0.211510 |
| H  | 5.437493  | -2.703390 | -1.547816 |
| C  | 2.801849  | -2.829932 | 0.392640  |
| H  | 3.370239  | -2.807036 | 1.327115  |

|   |           |           |           |
|---|-----------|-----------|-----------|
| H | 1.737832  | -2.725277 | 0.626150  |
| H | 2.941176  | -3.820476 | -0.055756 |
| C | -2.050617 | -1.812293 | 2.331313  |
| H | -1.427132 | -2.578551 | 1.856043  |
| H | -1.413781 | -0.972999 | 2.634362  |
| H | -2.471985 | -2.251743 | 3.241455  |
| C | -4.593287 | -2.590779 | 0.753824  |
| H | -5.353519 | -2.244145 | 0.045055  |
| H | -4.065084 | -3.429819 | 0.289933  |
| H | -5.111743 | -2.965267 | 1.642929  |
| C | 2.392226  | -1.666450 | -2.415798 |
| H | 2.542664  | -2.645678 | -2.882140 |
| H | 1.322776  | -1.555280 | -2.204023 |
| H | 2.689374  | -0.906346 | -3.147645 |
| C | -4.330070 | 0.201782  | 2.013224  |
| H | -5.182813 | 0.552464  | 1.424886  |
| H | -4.709628 | -0.133283 | 2.985475  |
| H | -3.653154 | 1.043048  | 2.189111  |
| O | -1.179840 | 1.560012  | 1.655635  |
| H | -0.292730 | 1.608299  | 2.084965  |
| H | -1.478479 | 2.480839  | 1.575705  |
| O | 1.323459  | 1.479140  | -1.735326 |
| H | 0.775615  | 0.998707  | -2.379643 |
| H | 2.068046  | 0.894630  | -1.461199 |
| O | -0.464286 | 3.422430  | -0.396373 |
| H | -1.039597 | 3.037920  | -1.103584 |
| H | 0.289262  | 3.837453  | -0.842846 |
| O | 0.055789  | -0.754618 | -0.015627 |
| H | -0.906743 | -0.979696 | -0.022922 |
| H | 0.380010  | -0.862959 | 0.893458  |

(H-profile)PDMS-Mgd

|    |           |           |           |
|----|-----------|-----------|-----------|
| Si | 3.440304  | -1.047923 | 0.929132  |
| O  | 2.945132  | 0.541074  | 0.831000  |
| Si | 2.822016  | 1.593222  | -0.508578 |
| O  | 1.471003  | 1.256765  | -1.310247 |
| Mg | 0.109155  | -0.082609 | -1.064120 |
| O  | -1.269070 | -1.511329 | -0.882169 |
| Si | -2.857674 | -1.155469 | -0.845157 |
| O  | -3.062194 | 0.434711  | -0.311802 |
| Si | -3.233208 | 1.245236  | 1.143803  |
| C  | -3.593500 | -1.164103 | -2.569247 |
| H  | -4.660906 | -0.922047 | -2.549033 |
| H  | -3.098620 | -0.418542 | -3.202544 |
| H  | -3.480022 | -2.144232 | -3.044718 |
| C  | -3.797679 | -2.303893 | 0.299564  |
| H  | -3.257006 | -2.452823 | 1.239685  |
| H  | -4.795824 | -1.915401 | 0.530550  |
| H  | -3.924785 | -3.285815 | -0.169514 |
| C  | 2.821195  | 3.301477  | 0.260905  |
| H  | 2.741849  | 4.079703  | -0.504995 |
| H  | 1.969569  | 3.414412  | 0.940811  |
| H  | 3.734871  | 3.481921  | 0.836124  |
| C  | 4.366168  | 1.345229  | -1.549519 |
| H  | 4.386713  | 0.344378  | -1.996337 |
| H  | 4.383959  | 2.065480  | -2.374328 |
| H  | 5.283017  | 1.478674  | -0.965317 |
| C  | -4.985982 | 1.907782  | 1.228564  |
| H  | -5.200748 | 2.567674  | 0.381983  |

|   |           |           |           |
|---|-----------|-----------|-----------|
| H | -5.712744 | 1.088704  | 1.206804  |
| H | -5.150386 | 2.476518  | 2.150201  |
| C | -2.909580 | 0.114468  | 2.602880  |
| H | -3.753663 | -0.560432 | 2.778145  |
| H | -2.013918 | -0.498277 | 2.460061  |
| H | -2.766544 | 0.710816  | 3.511216  |
| C | 2.934665  | -1.671610 | 2.625739  |
| H | 3.376554  | -1.057171 | 3.416390  |
| H | 1.846928  | -1.654762 | 2.758549  |
| H | 3.270172  | -2.703608 | 2.777307  |
| C | 5.297820  | -1.193972 | 0.722572  |
| H | 5.615960  | -0.971397 | -0.299996 |
| H | 5.814945  | -0.500915 | 1.394121  |
| H | 5.631669  | -2.208906 | 0.965156  |
| C | -2.005519 | 2.665000  | 1.093843  |
| H | -2.086168 | 3.285758  | 1.992630  |
| H | -0.981755 | 2.278846  | 1.043430  |
| H | -2.181585 | 3.320039  | 0.232163  |
| C | 2.549892  | -2.054197 | -0.393227 |
| H | 2.615292  | -1.587918 | -1.383280 |
| H | 2.969427  | -3.063161 | -0.477575 |
| H | 1.486106  | -2.174493 | -0.144136 |
| O | -0.584905 | -2.397681 | 1.514591  |
| H | -0.876246 | -2.284717 | 0.566200  |
| H | -0.027825 | -3.186920 | 1.549439  |
| O | -1.116473 | 1.314173  | -1.979066 |
| H | -0.503814 | 2.054266  | -1.808255 |
| H | -1.922892 | 1.404805  | -1.427784 |
| O | 0.456214  | -1.147251 | -2.846031 |
| H | 0.302734  | -0.527836 | -3.576208 |
| H | -0.371256 | -1.650407 | -2.702719 |
| O | 0.212614  | 0.079092  | 0.984920  |
| H | 1.115202  | 0.374010  | 1.232119  |
| H | 0.028320  | -0.789341 | 1.422280  |

(H-profile)PDMS-Mg-M3

|    |           |           |           |
|----|-----------|-----------|-----------|
| Si | -3.393999 | 1.533677  | -0.938080 |
| O  | -2.492897 | 1.095980  | 0.394624  |
| Si | -2.530125 | -0.151485 | 1.553439  |
| O  | -1.526501 | -1.320764 | 1.112388  |
| Mg | 0.236084  | -1.365431 | 0.326995  |
| O  | 1.897424  | -1.661041 | -0.740673 |
| Si | 3.332594  | -0.978428 | -0.408634 |
| O  | 3.089217  | 0.362446  | 0.597208  |
| Si | 2.963075  | 2.025521  | 0.437685  |
| C  | 4.410671  | -2.125033 | 0.610959  |
| H  | 5.374617  | -1.662949 | 0.846870  |
| H  | 3.921899  | -2.366789 | 1.562304  |
| H  | 4.606226  | -3.063890 | 0.082321  |
| C  | 4.219267  | -0.412126 | -1.959285 |
| H  | 3.532721  | 0.099809  | -2.641345 |
| H  | 5.050818  | 0.264140  | -1.730784 |
| H  | 4.631873  | -1.275631 | -2.492475 |
| C  | -1.979017 | 0.706292  | 3.135380  |
| H  | -1.833156 | -0.011467 | 3.949918  |
| H  | -1.037896 | 1.250350  | 2.978677  |
| H  | -2.713158 | 1.446948  | 3.469027  |
| C  | -4.306449 | -0.733409 | 1.700172  |
| H  | -4.668245 | -1.140781 | 0.748844  |

|   |           |           |           |
|---|-----------|-----------|-----------|
| H | -4.376964 | -1.538430 | 2.438888  |
| H | -4.982288 | 0.070787  | 2.009616  |
| C | 4.597553  | 2.771316  | 0.982030  |
| H | 4.833230  | 2.496518  | 2.015149  |
| H | 5.417444  | 2.417634  | 0.347409  |
| H | 4.575718  | 3.864811  | 0.919588  |
| C | 2.603345  | 2.544237  | -1.328377 |
| H | 3.511830  | 2.526975  | -1.938945 |
| H | 1.861930  | 1.898089  | -1.806960 |
| H | 2.214839  | 3.569299  | -1.340325 |
| C | -2.502211 | 2.998453  | -1.695978 |
| H | -2.477804 | 3.841739  | -0.998469 |
| H | -1.464993 | 2.745203  | -1.944177 |
| H | -2.991523 | 3.334593  | -2.616054 |
| C | -5.143886 | 1.995959  | -0.452338 |
| H | -5.719381 | 1.122504  | -0.131146 |
| H | -5.141162 | 2.719895  | 0.369017  |
| H | -5.669874 | 2.450959  | -1.298801 |
| C | 1.604677  | 2.568166  | 1.617012  |
| H | 1.546298  | 3.660612  | 1.669201  |
| H | 0.632541  | 2.193537  | 1.282283  |
| H | 1.795852  | 2.207028  | 2.635170  |
| C | -3.406175 | 0.098313  | -2.153081 |
| H | -3.898539 | -0.780021 | -1.719918 |
| H | -3.938708 | 0.356030  | -3.074733 |
| H | -2.381501 | -0.181217 | -2.427133 |
| O | 0.873429  | -0.335893 | -2.827832 |
| H | 1.324973  | -0.974162 | -2.211316 |
| H | 0.284477  | -0.874013 | -3.374418 |
| O | 1.205876  | -0.841240 | 2.083222  |
| H | 0.569353  | -0.335794 | 2.613825  |
| H | 1.924807  | -0.231761 | 1.785210  |
| O | 0.582364  | -3.432130 | 0.704187  |
| H | 0.828479  | -3.508249 | 1.638732  |
| H | 1.415532  | -3.328676 | 0.196390  |
| O | 0.072063  | 0.533879  | -0.462067 |
| H | -0.825909 | 0.884871  | -0.275352 |
| H | 0.199446  | 0.426438  | -1.439479 |
| C | -2.007019 | -2.706933 | -0.990197 |
| O | -3.027294 | -3.144674 | -0.670136 |
| O | -0.987802 | -2.310459 | -1.420930 |

(H-profile)TS-M3M4

|    |           |           |           |
|----|-----------|-----------|-----------|
| Si | -3.387819 | 1.609850  | -0.833053 |
| O  | -2.501837 | 0.961344  | 0.429020  |
| Si | -2.550383 | -0.379136 | 1.457109  |
| O  | -1.574145 | -1.528585 | 0.857724  |
| Mg | 0.282295  | -1.473923 | 0.189535  |
| O  | 1.984893  | -1.645437 | -0.821909 |
| Si | 3.381175  | -0.904612 | -0.461069 |
| O  | 3.063498  | 0.364039  | 0.618802  |
| Si | 2.884074  | 2.028613  | 0.549436  |
| C  | 4.533278  | -2.036920 | 0.491081  |
| H  | 5.469235  | -1.530347 | 0.747655  |
| H  | 4.067900  | -2.358965 | 1.430305  |
| H  | 4.780718  | -2.932606 | -0.088052 |
| C  | 4.224244  | -0.202952 | -1.980202 |
| H  | 3.508428  | 0.310917  | -2.630063 |
| H  | 5.022262  | 0.501041  | -1.718156 |

|                       |           |           |           |
|-----------------------|-----------|-----------|-----------|
| H                     | 4.675965  | -1.012475 | -2.563903 |
| C                     | -1.880731 | 0.264695  | 3.092339  |
| H                     | -1.584949 | -0.555099 | 3.756138  |
| H                     | -1.018303 | 0.924897  | 2.929991  |
| H                     | -2.628848 | 0.865160  | 3.620002  |
| C                     | -4.325861 | -0.941449 | 1.614655  |
| H                     | -4.738642 | -1.220488 | 0.639576  |
| H                     | -4.387166 | -1.827438 | 2.254633  |
| H                     | -4.958064 | -0.160553 | 2.050300  |
| C                     | 4.488745  | 2.796294  | 1.148005  |
| H                     | 4.726878  | 2.472225  | 2.166132  |
| H                     | 5.323657  | 2.504814  | 0.501445  |
| H                     | 4.431683  | 3.890274  | 1.145404  |
| C                     | 2.513586  | 2.638922  | -1.185102 |
| H                     | 3.423094  | 2.692599  | -1.791802 |
| H                     | 1.796747  | 1.996266  | -1.703982 |
| H                     | 2.087183  | 3.647820  | -1.136593 |
| C                     | -2.450276 | 3.147507  | -1.351294 |
| H                     | -2.411460 | 3.873843  | -0.533214 |
| H                     | -1.417556 | 2.903912  | -1.626776 |
| H                     | -2.918160 | 3.633319  | -2.213728 |
| C                     | -5.124198 | 2.031694  | -0.270857 |
| H                     | -5.705131 | 1.132031  | -0.045550 |
| H                     | -5.102406 | 2.655352  | 0.628766  |
| H                     | -5.657250 | 2.586686  | -1.050483 |
| C                     | 1.498642  | 2.460416  | 1.744491  |
| H                     | 1.410796  | 3.545598  | 1.863683  |
| H                     | 0.540861  | 2.082987  | 1.372921  |
| H                     | 1.688031  | 2.041565  | 2.740720  |
| C                     | -3.420034 | 0.364925  | -2.237303 |
| H                     | -3.963601 | -0.543075 | -1.955095 |
| H                     | -3.901807 | 0.781118  | -3.128479 |
| H                     | -2.400434 | 0.072998  | -2.519213 |
| O                     | 0.846911  | -0.306033 | -2.857641 |
| H                     | 1.359884  | -0.931914 | -2.280423 |
| H                     | 0.195587  | -0.864157 | -3.306758 |
| O                     | 1.156766  | -0.930695 | 1.996676  |
| H                     | 0.544769  | -0.424173 | 2.553328  |
| H                     | 1.882436  | -0.321278 | 1.706629  |
| O                     | 0.754196  | -3.494433 | 0.629981  |
| H                     | 1.058782  | -3.502915 | 1.550672  |
| H                     | 1.555942  | -3.374045 | 0.077949  |
| O                     | 0.084848  | 0.487263  | -0.455143 |
| H                     | -0.819656 | 0.814522  | -0.267636 |
| H                     | 0.215774  | 0.404276  | -1.437663 |
| C                     | -2.028264 | -2.407206 | -0.913788 |
| O                     | -3.141503 | -2.745943 | -0.825436 |
| O                     | -0.960397 | -2.255169 | -1.434470 |
| (H-profile)PDMS-Mg-M4 |           |           |           |
| Si                    | -3.602591 | 1.465586  | -0.825487 |
| O                     | -2.708082 | 0.865497  | 0.479792  |
| Si                    | -2.655779 | -0.442115 | 1.490248  |
| O                     | -1.665790 | -1.575335 | 0.700240  |
| Mg                    | 0.368410  | -1.518722 | 0.034977  |
| O                     | 2.054203  | -1.603270 | -0.964824 |
| Si                    | 3.454831  | -0.863710 | -0.645389 |
| O                     | 3.166017  | 0.292149  | 0.567431  |
| Si                    | 3.067483  | 1.960260  | 0.687737  |

|                    |           |           |           |
|--------------------|-----------|-----------|-----------|
| C                  | 4.713335  | -2.027262 | 0.113994  |
| H                  | 5.648266  | -1.506944 | 0.346305  |
| H                  | 4.334619  | -2.452308 | 1.051048  |
| H                  | 4.946197  | -2.856611 | -0.561649 |
| C                  | 4.167452  | 0.001409  | -2.146866 |
| H                  | 3.399938  | 0.568226  | -2.684213 |
| H                  | 4.980775  | 0.687224  | -1.883300 |
| H                  | 4.574152  | -0.740272 | -2.842872 |
| C                  | -1.668660 | 0.065774  | 2.995639  |
| H                  | -1.233547 | -0.803833 | 3.501047  |
| H                  | -0.876437 | 0.772746  | 2.720638  |
| H                  | -2.307090 | 0.580002  | 3.720690  |
| C                  | -4.315085 | -1.137961 | 1.942836  |
| H                  | -4.812586 | -1.542173 | 1.059414  |
| H                  | -4.190275 | -1.947950 | 2.669321  |
| H                  | -4.952054 | -0.372221 | 2.397619  |
| C                  | 4.734973  | 2.599529  | 1.259589  |
| H                  | 5.021082  | 2.155020  | 2.218078  |
| H                  | 5.515320  | 2.352478  | 0.531448  |
| H                  | 4.724620  | 3.688173  | 1.379792  |
| C                  | 2.593817  | 2.763190  | -0.937870 |
| H                  | 3.433330  | 2.797161  | -1.638494 |
| H                  | 1.767020  | 2.231809  | -1.418805 |
| H                  | 2.269088  | 3.794565  | -0.757627 |
| C                  | -3.704088 | 3.314501  | -0.537159 |
| H                  | -4.240839 | 3.541151  | 0.389573  |
| H                  | -2.704573 | 3.755151  | -0.462333 |
| H                  | -4.228310 | 3.812018  | -1.359972 |
| C                  | -5.303556 | 0.693177  | -0.869656 |
| H                  | -5.224105 | -0.375988 | -1.084853 |
| H                  | -5.835349 | 0.824652  | 0.078682  |
| H                  | -5.906653 | 1.160308  | -1.656167 |
| C                  | 1.751737  | 2.296508  | 1.987175  |
| H                  | 1.707955  | 3.360018  | 2.243496  |
| H                  | 0.773682  | 2.003661  | 1.590980  |
| H                  | 1.948406  | 1.745545  | 2.914971  |
| C                  | -2.645343 | 1.102699  | -2.395047 |
| H                  | -2.557995 | 0.021700  | -2.546973 |
| H                  | -3.179333 | 1.516267  | -3.258089 |
| H                  | -1.643054 | 1.546004  | -2.396919 |
| O                  | 0.600473  | -0.174683 | -2.793083 |
| H                  | 1.269032  | -0.778993 | -2.389205 |
| H                  | -0.170563 | -0.758696 | -2.907629 |
| O                  | 1.232099  | -1.030071 | 1.876878  |
| H                  | 0.695693  | -0.461499 | 2.450082  |
| H                  | 1.989816  | -0.469080 | 1.556513  |
| O                  | 0.871776  | -3.505395 | 0.559263  |
| H                  | 1.324765  | -3.409728 | 1.412605  |
| H                  | 1.582625  | -3.470206 | -0.113112 |
| O                  | 0.064484  | 0.528337  | -0.318682 |
| H                  | -0.852924 | 0.832774  | -0.176651 |
| H                  | 0.213395  | 0.480877  | -1.311124 |
| C                  | -2.045809 | -1.862310 | -0.669156 |
| O                  | -3.228919 | -1.814357 | -0.939880 |
| O                  | -1.010369 | -2.056896 | -1.362438 |
| (H-profile)TS-M4M5 |           |           |           |
| Si                 | -3.287181 | 1.335143  | -1.145649 |
| O                  | -2.540503 | 0.830564  | 0.284005  |

|    |           |           |           |
|----|-----------|-----------|-----------|
| Si | -2.792155 | -0.296817 | 1.475566  |
| O  | -1.689803 | -1.538167 | 1.140665  |
| Mg | 0.910380  | -1.921943 | -0.045741 |
| O  | 2.681998  | -1.648986 | -0.808178 |
| Si | 3.621145  | -0.374406 | -0.471569 |
| O  | 2.779850  | 0.636648  | 0.598311  |
| Si | 2.294854  | 2.235168  | 0.635402  |
| C  | 5.172226  | -0.873139 | 0.455859  |
| H  | 5.785573  | 0.000711  | 0.700494  |
| H  | 4.915312  | -1.367244 | 1.399790  |
| H  | 5.786343  | -1.564311 | -0.130287 |
| C  | 4.066502  | 0.602618  | -2.008378 |
| H  | 3.174632  | 0.857361  | -2.590253 |
| H  | 4.599990  | 1.531327  | -1.775556 |
| H  | 4.718185  | -0.000025 | -2.650244 |
| C  | -2.185977 | 0.398455  | 3.098344  |
| H  | -2.205976 | -0.373675 | 3.874773  |
| H  | -1.170675 | 0.801965  | 3.040041  |
| H  | -2.835418 | 1.216554  | 3.426496  |
| C  | -4.544969 | -0.890903 | 1.654125  |
| H  | -4.876533 | -1.428680 | 0.765058  |
| H  | -4.602094 | -1.570323 | 2.511691  |
| H  | -5.228244 | -0.057080 | 1.846826  |
| C  | 3.707649  | 3.257437  | 1.327448  |
| H  | 3.995049  | 2.909648  | 2.324785  |
| H  | 4.590822  | 3.184560  | 0.682793  |
| H  | 3.437033  | 4.316186  | 1.401369  |
| C  | 1.786615  | 2.902126  | -1.041976 |
| H  | 2.639553  | 3.100436  | -1.696917 |
| H  | 1.117781  | 2.197844  | -1.544935 |
| H  | 1.244147  | 3.845274  | -0.905538 |
| C  | -3.399507 | 3.201318  | -1.015730 |
| H  | -4.036322 | 3.503807  | -0.178279 |
| H  | -2.406770 | 3.635294  | -0.855064 |
| H  | -3.814161 | 3.638791  | -1.930006 |
| C  | -4.973808 | 0.555726  | -1.352002 |
| H  | -4.870344 | -0.529988 | -1.438004 |
| H  | -5.651166 | 0.781946  | -0.522772 |
| H  | -5.437370 | 0.930595  | -2.271607 |
| C  | 0.813458  | 2.293905  | 1.788761  |
| H  | 0.538813  | 3.328219  | 2.022212  |
| H  | -0.059748 | 1.823888  | 1.321178  |
| H  | 1.020640  | 1.790716  | 2.741048  |
| C  | -2.192487 | 0.856080  | -2.590200 |
| H  | -2.031525 | -0.227525 | -2.610478 |
| H  | -2.687633 | 1.131357  | -3.528125 |
| H  | -1.224923 | 1.369523  | -2.575004 |
| O  | 0.648688  | -1.689621 | -2.664573 |
| H  | 1.578627  | -1.857506 | -2.404792 |
| H  | 0.135402  | -2.496788 | -2.488586 |
| O  | 1.100273  | -1.158073 | 1.847491  |
| H  | 0.188361  | -0.898369 | 2.071194  |
| H  | 1.621442  | -0.346359 | 1.634389  |
| O  | 1.864638  | -3.713743 | 0.555581  |
| H  | 1.924326  | -3.785548 | 1.519695  |
| H  | 2.709207  | -3.331744 | 0.237584  |
| O  | 0.129333  | -0.026387 | -0.631730 |
| H  | -0.769333 | 0.270940  | -0.384516 |
| H  | 0.102000  | -0.279170 | -1.582735 |

|   |           |           |           |
|---|-----------|-----------|-----------|
| C | -1.814002 | -2.147629 | -0.117852 |
| O | -2.832416 | -1.930650 | -0.759033 |
| O | -0.787938 | -2.825647 | -0.439005 |

(H-profile)PDMS-Mg-M5

|    |           |           |           |
|----|-----------|-----------|-----------|
| Si | -3.098504 | 1.409151  | -1.118325 |
| O  | -2.392098 | 0.586177  | 0.168993  |
| Si | -2.826093 | -0.508857 | 1.344258  |
| O  | -1.679013 | -1.744494 | 1.254960  |
| Mg | 1.169632  | -2.088112 | -0.301312 |
| O  | 3.020799  | -1.433022 | -0.584611 |
| Si | 3.572017  | 0.016609  | -0.150732 |
| O  | 2.292801  | 0.870532  | 0.575839  |
| Si | 1.766925  | 2.451598  | 0.496988  |
| C  | 4.897317  | -0.069729 | 1.174764  |
| H  | 5.223182  | 0.932233  | 1.475857  |
| H  | 4.508963  | -0.573237 | 2.067123  |
| H  | 5.778208  | -0.622394 | 0.832549  |
| C  | 4.196019  | 1.007210  | -1.619252 |
| H  | 3.438248  | 1.053537  | -2.408216 |
| H  | 4.482310  | 2.032330  | -1.357878 |
| H  | 5.081239  | 0.516883  | -2.038996 |
| C  | -2.503776 | 0.268859  | 3.007716  |
| H  | -2.733219 | -0.430690 | 3.817635  |
| H  | -1.457207 | 0.573277  | 3.108818  |
| H  | -3.120233 | 1.162873  | 3.147262  |
| C  | -4.563783 | -1.156847 | 1.206760  |
| H  | -4.733187 | -1.602098 | 0.224364  |
| H  | -4.702510 | -1.939508 | 1.960871  |
| H  | -5.311770 | -0.379770 | 1.390548  |
| C  | 3.086467  | 3.583047  | 1.206006  |
| H  | 3.313606  | 3.314651  | 2.243019  |
| H  | 4.018087  | 3.517153  | 0.633228  |
| H  | 2.761625  | 4.629090  | 1.190991  |
| C  | 1.372415  | 2.937515  | -1.272761 |
| H  | 2.278050  | 3.083558  | -1.868452 |
| H  | 0.774893  | 2.155760  | -1.756370 |
| H  | 0.804399  | 3.874323  | -1.299586 |
| C  | -2.478686 | 3.170657  | -0.988887 |
| H  | -2.805406 | 3.632611  | -0.051239 |
| H  | -1.384438 | 3.195159  | -1.009313 |
| H  | -2.844753 | 3.785719  | -1.817785 |
| C  | -4.967021 | 1.365530  | -0.980566 |
| H  | -5.364543 | 0.356172  | -1.120405 |
| H  | -5.312499 | 1.738985  | -0.010594 |
| H  | -5.404382 | 2.006353  | -1.754486 |
| C  | 0.215744  | 2.536126  | 1.548835  |
| H  | -0.175353 | 3.559182  | 1.588946  |
| H  | -0.585460 | 1.899903  | 1.153196  |
| H  | 0.427069  | 2.223851  | 2.578240  |
| C  | -2.546740 | 0.603498  | -2.716186 |
| H  | -2.694459 | -0.481012 | -2.653922 |
| H  | -3.136328 | 0.979633  | -3.559135 |
| H  | -1.493125 | 0.808535  | -2.935064 |
| O  | 1.394215  | -2.632370 | -2.315729 |
| H  | 2.321493  | -2.317520 | -2.259220 |
| H  | 1.416176  | -3.601158 | -2.353698 |
| O  | 1.035166  | -1.334583 | 1.613129  |
| H  | 0.077449  | -1.375292 | 1.817040  |

|   |           |           |           |
|---|-----------|-----------|-----------|
| H | 1.321118  | -0.399043 | 1.518609  |
| O | 2.313766  | -3.772934 | 0.282692  |
| H | 2.079451  | -4.000973 | 1.194907  |
| H | 3.078473  | -3.157312 | 0.313528  |
| O | 0.019283  | -0.474241 | -1.096183 |
| H | -0.637061 | -0.018363 | -0.529296 |
| H | -0.532063 | -0.923704 | -1.764099 |
| C | -1.561602 | -2.428829 | 0.028695  |
| O | -2.423159 | -2.209110 | -0.816523 |
| O | -0.515583 | -3.132653 | -0.041895 |
